# Supplementary material for: Exploring Avenues beyond Revised DSD Functionals: II. Random-Phase Approximation and Scaled MP3 Corrections
Source: PubMed Central journal article supplement (PMC8279643; doi:10.1021/acs.jpca.1c01295), 2021-05-21
Supplement: jp1c01295_si_001.pdf [file jp1c01295_si_001.pdf]

# Electronic Supporting Information (ESI)

## **Exploring Avenues Beyond Revised DSD Functionals: II. Random-Phase Approximation and scaled MP3 corrections**

*Golokesh Santra,<sup>†</sup> Emmanouil Semidalas,<sup>†</sup> and Jan M.L. Martin<sup>\*,†</sup>*

<sup>†</sup>Department of Organic Chemistry, Weizmann Institute of Science, 7610001 Rehovot, Israel.

Email: [gershom@weizmann.ac.il](mailto:gershom@weizmann.ac.il)

## Abbreviations and descriptions used for the GMTKN55 database:

The abbreviations and a concise description of all fifty-five subsets of the GMTKN55 database proposed by Goerigk, Grimme and coworkers<sup>1</sup> are listed in Table S1 below. For a more detailed description of all of them and individual reactions refer to refs. <sup>1-3</sup>.

Table S1: Abbreviations used and their descriptions for the 55 datasets in GMTKN55.

| Abbreviation                  | Description                                                                                                                  |
|-------------------------------|------------------------------------------------------------------------------------------------------------------------------|
| ACONF <sup>4</sup>            | Relative energies of alkane conformers                                                                                       |
| ADIM6 <sup>5</sup>            | Interaction energies of n-alkane dimers                                                                                      |
| AHB21 <sup>6</sup>            | Interaction energies in anion–neutral dimers                                                                                 |
| AL2X6 <sup>1</sup>            | Dimerisation energies of AlX <sub>3</sub> compounds                                                                          |
| ALK8 <sup>1</sup>             | Dissociation and other reactions of alkaline compounds                                                                       |
| ALKBDE10 <sup>7</sup>         | Dissociation energies in group-1 and -2 diatomics                                                                            |
| AMINO20X4 <sup>8</sup>        | Relative energies in amino acid conformers                                                                                   |
| BH76RC <sup>9</sup>           | 30 reaction energies of the BH76 <sup>10-12</sup> set                                                                        |
| BH76 <sup>10-12</sup>         | Barrier heights of hydrogen transfer, heavy atom transfer, nucleophilic substitution, unimolecular and association reactions |
| BHDIV10 <sup>1</sup>          | Diverse reaction barrier heights                                                                                             |
| BHPERI <sup>1,13,14,15</sup>  | Barrier heights of pericyclic reactions                                                                                      |
| BHROT27 <sup>1</sup>          | Barrier heights for rotation around single bonds                                                                             |
| BSR36 <sup>16,17</sup>        | Bond-separation reactions of saturated hydrocarbons                                                                          |
| BUT14DIOL <sup>18</sup>       | Relative energies in butane-1,4-diol conformers                                                                              |
| C60ISO <sup>19</sup>          | Relative energies between C <sub>60</sub> isomers                                                                            |
| CARBHB12 <sup>1</sup>         | Hydrogen-bonded complexes between carbene analogues and H <sub>2</sub> O, NH <sub>3</sub> , or HCl                           |
| CDIE20 <sup>20</sup>          | Double-bond isomerisation energies in cyclic systems                                                                         |
| CHB6 <sup>6</sup>             | Interaction energies in cation–neutral dimers                                                                                |
| DARC <sup>9,21</sup>          | Reaction energies of Diels–Alder reactions                                                                                   |
| DC13 <sup>22,9,23,24-32</sup> | 13 difficult cases for DFT methods                                                                                           |
| DIPCS10 <sup>1</sup>          | Double-ionisation potentials of closed-shell systems                                                                         |
| FH51 <sup>33,34</sup>         | Reaction energies in various (in-)organic systems                                                                            |
| G21EA <sup>9,35</sup>         | Adiabatic electron affinities                                                                                                |
| G21IP <sup>9,35</sup>         | Adiabatic ionisation potentials                                                                                              |
| G2RC <sup>7,36</sup>          | Reaction energies of selected G2/97 systems                                                                                  |
| HAL59 <sup>37,38</sup>        | Binding energies in halogenated dimers (incl. halogen bonds)                                                                 |
| HEAVY28 <sup>11</sup>         | Noncovalent interaction energies between heavy element hydrides                                                              |
| HEAVYSB11 <sup>1</sup>        | Dissociation energies in heavy-element compounds                                                                             |
| ICONF <sup>1</sup>            | Relative energies in conformers of inorganic systems                                                                         |
| IDISP <sup>9,39-42</sup>      | Intramolecular dispersion interactions                                                                                       |
| IL16 <sup>6</sup>             | Interaction energies in anion–cation dimers                                                                                  |
| INV24 <sup>43</sup>           | Inversion/racemisation barrier heights                                                                                       |
| ISO34 <sup>39</sup>           | Isomerisation energies of small and medium-sized organic molecules                                                           |
| ISOL24 <sup>44</sup>          | Isomerisation energies of large organic molecules                                                                            |
| MB16-43 <sup>1</sup>          | Decomposition energies of artificial molecules                                                                               |
| MCONF <sup>45</sup>           | Relative energies in melatonin conformers                                                                                    |

|                                 |                                                                                                                                                                                   |
|---------------------------------|-----------------------------------------------------------------------------------------------------------------------------------------------------------------------------------|
| <b>NBPRC</b> <sup>9,41,46</sup> | Oligomerisations and H <sub>2</sub> fragmentations of NH <sub>3</sub> /BH <sub>3</sub> systems; H <sub>2</sub> activation reactions with PH <sub>3</sub> /BH <sub>3</sub> systems |
| <b>PA26</b> <sup>1</sup>        | Adiabatic proton affinities (incl. of amino acids)                                                                                                                                |
| <b>PArel</b> <sup>1</sup>       | Relative energies in protonated isomers                                                                                                                                           |
| <b>PCONF21</b>                  | Relative energies in tri- and tetrapeptide conformers                                                                                                                             |
| <b>PNICO23</b> <sup>47</sup>    | Interaction energies in pnictogen-containing dimers                                                                                                                               |
| <b>PX13</b> <sup>48</sup>       | Proton-exchange barriers in H <sub>2</sub> O, NH <sub>3</sub> , and HF clusters                                                                                                   |
| <b>RC21</b> <sup>1</sup>        | Fragmentations and rearrangements in radical cations                                                                                                                              |
| <b>RG18</b> <sup>1</sup>        | Interaction energies in rare-gas complexes                                                                                                                                        |
| <b>RSE43</b> <sup>49</sup>      | Radical-stabilisation energies                                                                                                                                                    |
| <b>S22</b> <sup>50</sup>        | Binding energies of noncovalently bound dimers                                                                                                                                    |
| <b>S66</b> <sup>51</sup>        | Binding energies of noncovalently bound dimers                                                                                                                                    |
| <b>SCONF</b> <sup>9,52</sup>    | Relative energies of sugar conformers                                                                                                                                             |
| <b>SIE4X4</b> <sup>53</sup>     | Self-interaction-error related problems                                                                                                                                           |
| <b>TAUT15</b> <sup>1</sup>      | Relative energies in tautomers                                                                                                                                                    |
| <b>UPU23</b> <sup>54</sup>      | Relative energies between RNA-backbone conformers                                                                                                                                 |
| <b>W4-11</b> <sup>55</sup>      | Total atomisation energies                                                                                                                                                        |
| <b>WATER27</b> <sup>56</sup>    | Binding energies in (H <sub>2</sub> O) <sub>n</sub> , H+(H <sub>2</sub> O) <sub>n</sub> and OH-(H <sub>2</sub> O) <sub>n</sub>                                                    |
| <b>WCPT18</b> <sup>57</sup>     | Proton-transfer barriers in uncatalysed and water-catalysed reactions                                                                                                             |
| <b>YBDE18</b> <sup>58</sup>     | Bond-dissociation energies in ylides                                                                                                                                              |

Table S2: WTMAD2 (kcal/mol) and its breakdown into five major subcategories for original and refitted SCS-DRPA75, DSD-PBE<sub>d</sub>RPA75, DSD-PBEP86<sub>d</sub>RPA75 and corresponding revDSD functionals with D3BJ and D4 dispersion correction.

| Functionals                                     | WTMAD2 (kcal/mol) | THERMO | BARRIERS | LARGE | CONF  | INTERMOL |
|-------------------------------------------------|-------------------|--------|----------|-------|-------|----------|
| dRPA75                                          | 5.072             | 1.221  | 0.295    | 0.931 | 1.074 | 1.552    |
| SCS-dRPA75                                      | 4.791             | 0.939  | 0.310    | 0.917 | 1.074 | 1.552    |
| optSCS-dRPA75                                   | 4.712             | 0.867  | 0.300    | 0.919 | 1.074 | 1.552    |
| SCS-dRPA75-D3BJ                                 | 2.894             | 0.863  | 0.299    | 0.610 | 0.550 | 0.572    |
| SCS-dRPA75-D4                                   | 2.826             | 0.848  | 0.310    | 0.556 | 0.533 | 0.579    |
| optSCS-dRPA75-D3BJ                              | 2.758             | 0.739  | 0.287    | 0.608 | 0.553 | 0.571    |
| optSCS-dRPA75-D4                                | 2.700             | 0.724  | 0.312    | 0.534 | 0.523 | 0.608    |
| DSD-PBE <sub>d</sub> RPA <sub>75</sub> -D3BJ    | 2.377             | 0.614  | 0.228    | 0.513 | 0.432 | 0.590    |
| DSD-PBE <sub>d</sub> RPA <sub>75</sub> -D4      | 2.321             | 0.596  | 0.236    | 0.477 | 0.434 | 0.577    |
| DSD-PBEP86 <sub>d</sub> RPA <sub>75</sub> -D3BJ | 2.359             | 0.613  | 0.216    | 0.517 | 0.433 | 0.579    |
| DSD-PBEP86 <sub>d</sub> RPA <sub>75</sub> -D4   | 2.349             | 0.597  | 0.226    | 0.466 | 0.457 | 0.603    |
| revDSD-PBE-D3BJ                                 | 2.668             | 0.640  | 0.299    | 0.532 | 0.610 | 0.586    |
| revDSD-PBE-D4                                   | 2.393             | 0.643  | 0.290    | 0.555 | 0.413 | 0.491    |
| revDSD-PBEP86-D3BJ                              | 2.367             | 0.521  | 0.268    | 0.552 | 0.457 | 0.569    |
| revDSD-PBEP86-D4                                | 2.248             | 0.545  | 0.260    | 0.573 | 0.406 | 0.463    |
| ωB97M(2)                                        | 2.131             | 0.430  | 0.214    | 0.418 | 0.577 | 0.492    |

Table S3: WTMAD2(kcal/mol), optimized parameters and division of total WTMAD2 into five top-level subsets for DSD-PBEdRPA and DSD-PBEP86dRPA with both D3BJ and D4 dispersion correction.

| Functional     | Dispersion    | WTMAD2 (kcal/mol) | Parameters        |                    |                    |         |         |        |    |         |        |       | Five top-level subsets |          |       |       |          |
|----------------|---------------|-------------------|-------------------|--------------------|--------------------|---------|---------|--------|----|---------|--------|-------|------------------------|----------|-------|-------|----------|
|                |               |                   | C <sub>X,HF</sub> | C <sub>X,DFT</sub> | C <sub>C,DFT</sub> | CO-S    | CS-S    | s6     | s8 | cATM    | a1     | a2    | THERMO                 | BARRIERS | LARGE | CONF  | INTERMOL |
| DSD-PBEdRPA    | D3BJ          | 8.81              | 0.00              | 1.00               | 0.5877             | 0.2078  | -0.6099 | 1.4768 | 0  | N/A     | 0      | 4.505 | 2.712                  | 1.214    | 1.729 | 1.423 | 1.733    |
|                | D4            | 7.22              | 0.00              | 1.00               | 0.7861             | 0.0996  | -0.6646 | 1.5924 | 0  | -0.3616 | 0.213  | 4.390 | 2.643                  | 0.917    | 1.507 | 0.969 | 1.187    |
|                | D3BJ          | 6.09              | 0.25              | 0.75               | 0.5128             | 0.1971  | 0.0011  | 1.0310 | 0  | N/A     | 0      | 4.505 | 1.679                  | 1.038    | 1.199 | 0.979 | 1.195    |
|                | D4            | 4.98              | 0.25              | 0.75               | 0.6942             | -0.0781 | -0.0098 | 1.4014 | 0  | 0.3157  | 0.206  | 4.731 | 1.776                  | 0.621    | 1.045 | 0.725 | 0.812    |
|                | D3BJ          | 3.37              | 0.50              | 0.50               | 0.3332             | 0.9030  | -0.2004 | 0.8127 | 0  | N/A     | 0      | 4.505 | 0.927                  | 0.371    | 0.724 | 0.634 | 0.718    |
|                | D4            | 2.85              | 0.50              | 0.50               | 0.4372             | 0.8435  | -0.2262 | 1.0004 | 0  | 0.4909  | 0.114  | 5.061 | 0.775                  | 0.315    | 0.633 | 0.518 | 0.607    |
|                | D3BJ          | 2.41              | 0.68              | 0.32               | 0.1901             | 1.1052  | 0.3138  | 0.4563 | 0  | N/A     | 0      | 4.505 | 0.675                  | 0.240    | 0.517 | 0.428 | 0.547    |
|                | D4            | 2.34              | 0.68              | 0.32               | 0.2293             | 1.0797  | 0.3264  | 0.6050 | 0  | 0.7034  | 0.028  | 5.633 | 0.632                  | 0.231    | 0.494 | 0.443 | 0.540    |
|                | D3BJ          | 2.38              | 0.75              | 0.25               | 0.1151             | 1.2072  | 0.5250  | 0.3223 | 0  | N/A     | 0      | 4.505 | 0.614                  | 0.228    | 0.513 | 0.432 | 0.590    |
|                | D3BJ (a2 opt) | 2.33              | 0.75              | 0.25               | 0.1273             | 1.1991  | 0.5368  | 0.3383 | 0  | N/A     | 0      | 4.904 | 0.608                  | 0.228    | 0.507 | 0.456 | 0.531    |
|                | D4            | 2.32              | 0.75              | 0.25               | 0.1339             | 1.1967  | 0.5371  | 0.4257 | 0  | 0.6342  | -0.145 | 6.398 | 0.596                  | 0.236    | 0.477 | 0.434 | 0.577    |
|                | D3BJ          | 3.75              | 0.90              | 0.10               | -0.0524            | 1.4564  | 0.9315  | 0.0694 | 0  | N/A     | 0      | 4.505 | 0.670                  | 1.148    | 0.634 | 0.597 | 0.702    |
|                | D4            | 3.57              | 0.90              | 0.10               | -0.0790            | 1.4760  | 0.9732  | 0.1396 | 0  | 0.6544  | -0.187 | 6.188 | 0.666                  | 1.123    | 0.604 | 0.486 | 0.687    |
| DSD-PBEP86dRPA | D3BJ          | 8.55              | 0.00              | 1.00               | 0.5793             | 0.1823  | -0.7157 | 1.4229 | 0  | N/A     | 0      | 4.505 | 2.322                  | 1.077    | 1.837 | 1.457 | 1.856    |
|                | D4            | 7.07              | 0.00              | 1.00               | 0.7332             | 0.0865  | -0.7483 | 1.2576 | 0  | -0.8011 | 0.132  | 4.427 | 2.169                  | 0.886    | 1.706 | 1.053 | 1.259    |
|                | D3BJ          | 3.48              | 0.50              | 0.50               | 0.3326             | 0.8751  | -0.2262 | 0.7488 | 0  | N/A     | 0      | 4.505 | 0.908                  | 0.379    | 0.806 | 0.615 | 0.768    |
|                | D4            | 3.08              | 0.50              | 0.50               | 0.3990             | 0.8241  | -0.2193 | 0.7759 | 0  | -0.0008 | -0.007 | 5.333 | 0.810                  | 0.344    | 0.715 | 0.549 | 0.657    |
|                | D3BJ          | 2.43              | 0.69              | 0.31               | 0.1826             | 1.0984  | 0.3239  | 0.4036 | 0  | N/A     | 0      | 4.505 | 0.658                  | 0.235    | 0.538 | 0.410 | 0.590    |
|                | D4            | 2.40              | 0.69              | 0.31               | 0.2023             | 1.0799  | 0.3444  | 0.4709 | 0  | 0.3168  | -0.144 | 6.194 | 0.630                  | 0.230    | 0.492 | 0.460 | 0.590    |
|                | D3BJ          | 2.36              | 0.73              | 0.27               | 0.1400             | 1.1525  | 0.4591  | 0.3321 | 0  | N/A     | 0      | 4.505 | 0.625                  | 0.219    | 0.519 | 0.417 | 0.578    |
|                | D4            | 2.35              | 0.73              | 0.27               | 0.1482             | 1.1490  | 0.4785  | 0.4043 | 0  | 0.3983  | -0.234 | 6.677 | 0.606                  | 0.221    | 0.470 | 0.458 | 0.596    |
|                | D3BJ          | 2.36              | 0.75              | 0.25               | 0.1092             | 1.1936  | 0.5268  | 0.3012 | 0  | N/A     | 0      | 4.505 | 0.613                  | 0.216    | 0.517 | 0.433 | 0.579    |
|                | D3BJ (a2 opt) | 2.35              | 0.75              | 0.25               | 0.1204             | 1.1978  | 0.5046  | 0.3156 | 0  | N/A     | 0      | 4.752 | 0.611                  | 0.222    | 0.512 | 0.439 | 0.562    |
|                | D4            | 2.35              | 0.75              | 0.25               | 0.1219             | 1.1890  | 0.5281  | 0.3818 | 0  | 0.4571  | -0.251 | 6.772 | 0.597                  | 0.226    | 0.466 | 0.457 | 0.603    |
|                | D3BJ          | 3.01              | 0.90              | 0.10               | -0.0553            | 1.4644  | 0.9419  | 0.0744 | 0  | N/A     | 0      | 4.505 | 0.641                  | 0.430    | 0.621 | 0.594 | 0.727    |
|                | D4            | 2.85              | 0.90              | 0.10               | -0.0744            | 1.4857  | 0.9565  | 0.1606 | 0  | 0.5931  | -0.258 | 6.465 | 0.627                  | 0.427    | 0.584 | 0.493 | 0.715    |

Table S4: MAD, MSD and RMSD as well as breakdown of total WTMAD2 by each subset for optSCS-dRPA75

| subs.name      | MAD    | MSD     | RSMD   | dWTMAD2       | 5MAD/4RMSD |
|----------------|--------|---------|--------|---------------|------------|
| ACONF          | 0.231  | 0.231   | 0.261  | 0.0717        | 1.1055     |
| ADIM6          | 1.153  | -1.153  | 1.256  | 0.0782        | 1.1472     |
| AHB21          | 0.406  | 0.317   | 0.447  | 0.0144        | 1.1359     |
| AL2X6          | 3.685  | -3.685  | 3.807  | 0.0234        | 1.2098     |
| ALK8           | 3.571  | -2.907  | 4.728  | 0.0173        | 0.9443     |
| ALKBDE10       | 3.42   | -2.721  | 4.442  | 0.0129        | 0.9624     |
| AMINO20X4      | 0.229  | -0.126  | 0.313  | 0.2854        | 0.9151     |
| BH76RC         | 1.023  | 0.297   | 1.324  | 0.0545        | 0.9663     |
| BH76           | 1.095  | 0.36    | 2.085  | 0.1697        | 0.6563     |
| BHDIV10        | 0.924  | -0.012  | 1.12   | 0.0077        | 1.0319     |
| BHPERI         | 1.081  | 0.795   | 1.245  | 0.0511        | 1.0854     |
| BHROT27        | 0.141  | -0.124  | 0.202  | 0.023         | 0.8707     |
| BSR36          | 2.661  | -2.661  | 2.914  | 0.2245        | 1.1413     |
| BUT14DIOL      | 0.16   | -0.12   | 0.174  | 0.1393        | 1.1519     |
| C60ISO         | 6.907  | -6.907  | 8.798  | 0.024         | 0.9813     |
| CARBHB12       | 0.382  | -0.382  | 0.488  | 0.0289        | 0.9801     |
| CDIE20         | 0.369  | 0.345   | 0.446  | 0.0691        | 1.0349     |
| CHB6           | 0.807  | -0.807  | 1.239  | 0.0069        | 0.814      |
| DARC           | 4.363  | 4.363   | 4.421  | 0.0714        | 1.2336     |
| DC13           | 5.261  | 2.576   | 6.234  | 0.0472        | 1.0549     |
| DIPCS10        | 2.493  | 2.113   | 3.085  | 0.0014        | 1.0102     |
| FH51           | 1.766  | 1.419   | 2.214  | 0.1103        | 0.9971     |
| G21EA          | 2.036  | 0.009   | 2.488  | 0.0575        | 1.0228     |
| G21IP          | 2.494  | 1.909   | 3.375  | 0.0132        | 0.9235     |
| G2RC           | 2.019  | 1.356   | 2.602  | 0.0374        | 0.9698     |
| HAL59          | 0.567  | -0.567  | 0.646  | 0.2766        | 1.0972     |
| HEAVY28        | 0.355  | -0.349  | 0.392  | 0.3038        | 1.1312     |
| HEAVYSB11      | 2.241  | -2.241  | 2.442  | 0.0161        | 1.1468     |
| ICONF          | 0.265  | -0.12   | 0.355  | 0.0525        | 0.9344     |
| IDISP          | 3.128  | 1.379   | 3.797  | 0.0501        | 1.0298     |
| IL16           | 0.652  | 0.652   | 0.724  | 0.0036        | 1.1259     |
| INV24          | 0.797  | -0.478  | 1.05   | 0.0228        | 0.9487     |
| ISO34          | 0.909  | -0.579  | 1.194  | 0.0805        | 0.9511     |
| ISOL24         | 2.405  | -1.173  | 3.184  | 0.1145        | 0.9441     |
| MB16-43        | 22.206 | -22.206 | 26.379 | 0.0774        | 1.0522     |
| MCONF          | 0.397  | -0.395  | 0.435  | 0.1547        | 1.1417     |
| NBPRC          | 2.013  | 1.713   | 2.555  | 0.0186        | 0.9849     |
| PA26           | 3.974  | 3.974   | 4.229  | 0.0208        | 1.1746     |
| PAREL          | 0.543  | -0.117  | 0.919  | 0.0891        | 0.7389     |
| PCONF21        | 0.522  | -0.17   | 0.605  | 0.2199        | 1.0786     |
| PNICO23        | 0.889  | -0.889  | 0.994  | 0.1817        | 1.1186     |
| PX13           | 1.15   | -0.86   | 1.275  | 0.017         | 1.1279     |
| RC21           | 3.976  | -3.894  | 7.192  | 0.0888        | 0.691      |
| RG18           | 0.156  | -0.055  | 0.216  | 0.1844        | 0.9075     |
| RSE43          | 0.786  | 0.69    | 1.558  | 0.1689        | 0.6308     |
| S22            | 0.856  | -0.856  | 1.036  | 0.0979        | 1.032      |
| S66            | 0.739  | -0.739  | 0.839  | 0.3389        | 1.1011     |
| SCONF          | 0.249  | -0.219  | 0.287  | 0.035         | 1.0845     |
| SIE4X4         | 11.102 | 11.102  | 13.167 | 0.2           | 1.0539     |
| TAUT15         | 0.335  | -0.076  | 0.408  | 0.0626        | 1.0264     |
| UPU23          | 0.427  | 0.282   | 0.543  | 0.0651        | 0.9817     |
| W4-11          | 3.024  | 0.727   | 4.157  | 0.0524        | 0.9091     |
| WATER27        | 2.905  | -2.838  | 4.531  | 0.0367        | 0.8012     |
| WCPT18         | 0.45   | 0.118   | 0.573  | 0.0088        | 0.9818     |
| YBDE18         | 2.362  | -1.401  | 2.831  | 0.0328        | 1.0428     |
| <b>GMTKN55</b> |        |         |        | <b>4.7123</b> |            |

Table S5: MAD, MSD and RMSD as well as breakdown of total WTMAD2 by each subset for SCS-dRPA74-D3BJ

| subs.name      | MAD   | MSD    | RSMD   | dWTMAD2       | 5MAD/4RMSD |
|----------------|-------|--------|--------|---------------|------------|
| ACONF          | 0.019 | 0.011  | 0.03   | 0.0058        | 0.7915     |
| ADIM6          | 0.056 | -0.056 | 0.065  | 0.0038        | 1.0862     |
| AHB21          | 0.187 | -0.047 | 0.282  | 0.0066        | 0.8294     |
| AL2X6          | 0.86  | -0.853 | 0.961  | 0.0055        | 1.1187     |
| ALK8           | 2.455 | 0.053  | 3.065  | 0.0119        | 1.0011     |
| ALKBDE10       | 2.648 | 0.059  | 3.229  | 0.01          | 1.0253     |
| AMINO20X4      | 0.141 | -0.077 | 0.19   | 0.1762        | 0.929      |
| BH76RC         | 1.06  | 0.216  | 1.353  | 0.0564        | 0.9789     |
| BH76           | 1.219 | 0.048  | 2.219  | 0.189         | 0.6867     |
| BHDIV10        | 0.952 | -0.661 | 1.14   | 0.008         | 1.0439     |
| BHPERI         | 0.731 | -0.731 | 0.858  | 0.0345        | 1.0644     |
| BHROT27        | 0.107 | -0.082 | 0.166  | 0.0175        | 0.8037     |
| BSR36          | 0.873 | -0.873 | 0.91   | 0.0736        | 1.1991     |
| BUT14DIOL      | 0.038 | 0.014  | 0.051  | 0.033         | 0.9303     |
| C60ISO         | 6.31  | -6.289 | 8.256  | 0.0219        | 0.9554     |
| CARBHB12       | 0.114 | -0.02  | 0.177  | 0.0086        | 0.8057     |
| CDIE20         | 0.28  | 0.25   | 0.359  | 0.0524        | 0.975      |
| CHB6           | 1.204 | -1.204 | 1.559  | 0.0102        | 0.9649     |
| DARC           | 1.742 | 1.742  | 1.834  | 0.0285        | 1.1874     |
| DC13           | 3.316 | 0.704  | 4.187  | 0.0298        | 0.99       |
| DIPCS10        | 2.512 | 2.143  | 3.105  | 0.0015        | 1.0113     |
| FH51           | 1.262 | 0.939  | 1.677  | 0.0788        | 0.9406     |
| G21EA          | 2.586 | 0.389  | 3.17   | 0.073         | 1.0198     |
| G21IP          | 3.012 | 2.272  | 3.976  | 0.016         | 0.9469     |
| G2RC           | 1.901 | 1.115  | 2.55   | 0.0352        | 0.9317     |
| HAL59          | 0.193 | -0.042 | 0.251  | 0.094         | 0.9613     |
| HEAVY28        | 0.136 | -0.054 | 0.157  | 0.1161        | 1.0773     |
| HEAVYSB11      | 1.421 | 1.421  | 1.652  | 0.0102        | 1.0756     |
| ICONF          | 0.141 | -0.077 | 0.194  | 0.0279        | 0.9075     |
| IDISP          | 1.058 | 1.058  | 1.482  | 0.017         | 0.8926     |
| IL16           | 0.373 | -0.284 | 0.427  | 0.0021        | 1.0908     |
| INV24          | 0.575 | -0.071 | 0.91   | 0.0164        | 0.7899     |
| ISO34          | 0.731 | -0.44  | 0.953  | 0.0648        | 0.9596     |
| ISOL24         | 1.631 | -0.589 | 2.215  | 0.0776        | 0.9203     |
| MB16-43        | 7.26  | -3.943 | 13.123 | 0.0253        | 0.6915     |
| MCONF          | 0.18  | 0.111  | 0.201  | 0.0702        | 1.1221     |
| NBPRC          | 1.065 | 0.619  | 1.247  | 0.0098        | 1.0674     |
| PA26           | 4.27  | 4.27   | 4.492  | 0.0223        | 1.1882     |
| PAREL          | 0.553 | -0.115 | 0.867  | 0.0907        | 0.7974     |
| PCONF21        | 0.276 | -0.139 | 0.346  | 0.1162        | 0.9951     |
| PNICO23        | 0.314 | -0.312 | 0.354  | 0.0642        | 1.1096     |
| PX13           | 1.37  | -1.323 | 1.542  | 0.0203        | 1.1105     |
| RC21           | 3.204 | -2.854 | 6.228  | 0.0716        | 0.643      |
| RG18           | 0.155 | 0.079  | 0.198  | 0.1831        | 0.982      |
| RSE43          | 0.816 | 0.724  | 1.687  | 0.1752        | 0.6046     |
| S22            | 0.086 | 0.03   | 0.112  | 0.0098        | 0.9552     |
| S66            | 0.087 | 0.024  | 0.12   | 0.04          | 0.9096     |
| SCONF          | 0.143 | -0.067 | 0.244  | 0.02          | 0.7321     |
| SIE4X4         | 9.667 | 9.667  | 11.352 | 0.1741        | 1.0645     |
| TAUT15         | 0.338 | -0.009 | 0.425  | 0.0631        | 0.9944     |
| UPU23          | 0.549 | -0.04  | 0.74   | 0.0837        | 0.9261     |
| W4-11          | 8.958 | 8.644  | 10.664 | 0.1551        | 1.05       |
| WATER27        | 2.646 | -2.193 | 6.176  | 0.0334        | 0.5356     |
| WCPT18         | 0.678 | -0.431 | 0.877  | 0.0132        | 0.9654     |
| YBDE18         | 2.789 | 1.739  | 3.328  | 0.0387        | 1.0474     |
| <b>GMTKN55</b> |       |        |        | <b>2.8942</b> |            |

Table S6: MAD, MSD and RMSD as well as breakdown of total WTMAD2 by each subset for optSCS-dRPA75-D3BJ

| subs.name      | MAD    | MSD    | RSMD   | dWTMAD2       | 5MAD/4RMSD |
|----------------|--------|--------|--------|---------------|------------|
| ACONF          | 0.019  | 0.009  | 0.029  | 0.0058        | 0.8121     |
| ADIM6          | 0.051  | -0.049 | 0.058  | 0.0035        | 1.0936     |
| AHB21          | 0.187  | -0.049 | 0.282  | 0.0066        | 0.8285     |
| AL2X6          | 0.845  | -0.833 | 0.943  | 0.0054        | 1.1197     |
| ALK8           | 2.461  | 0.073  | 3.071  | 0.0119        | 1.0017     |
| ALKBDE10       | 3.326  | -2.409 | 4.085  | 0.0125        | 1.0177     |
| AMINO20X4      | 0.141  | -0.077 | 0.19   | 0.1759        | 0.9295     |
| BH76RC         | 0.944  | 0.38   | 1.271  | 0.0502        | 0.9283     |
| BH76           | 1.14   | -0.009 | 2.024  | 0.1767        | 0.704      |
| BHDIV10        | 0.955  | -0.666 | 1.143  | 0.008         | 1.0447     |
| BHPERI         | 0.741  | -0.741 | 0.867  | 0.0351        | 1.0685     |
| BHROT27        | 0.107  | -0.082 | 0.166  | 0.0174        | 0.8039     |
| BSR36          | 0.86   | -0.86  | 0.896  | 0.0726        | 1.1999     |
| BUT14DIOL      | 0.038  | 0.015  | 0.051  | 0.033         | 0.9322     |
| C60ISO         | 6.306  | -6.285 | 8.252  | 0.0219        | 0.9552     |
| CARBHB12       | 0.114  | -0.017 | 0.176  | 0.0086        | 0.8123     |
| CDIE20         | 0.279  | 0.25   | 0.359  | 0.0523        | 0.9742     |
| CHB6           | 1.207  | -1.207 | 1.562  | 0.0103        | 0.9656     |
| DARC           | 1.724  | 1.724  | 1.816  | 0.0282        | 1.1863     |
| DC13           | 3.233  | 1.379  | 4.101  | 0.029         | 0.9853     |
| DIPCS10        | 2.512  | 2.143  | 3.105  | 0.0015        | 1.0113     |
| FH51           | 1.26   | 0.936  | 1.674  | 0.0786        | 0.9403     |
| G21EA          | 1.914  | -0.135 | 2.327  | 0.054         | 1.0279     |
| G21IP          | 2.408  | 1.805  | 3.269  | 0.0128        | 0.9207     |
| G2RC           | 1.903  | 1.114  | 2.552  | 0.0352        | 0.9323     |
| HAL59          | 0.193  | -0.039 | 0.25   | 0.0941        | 0.9629     |
| HEAVY28        | 0.135  | -0.052 | 0.157  | 0.1154        | 1.0757     |
| HEAVYSB11      | 0.924  | -0.356 | 1.014  | 0.0067        | 1.1398     |
| ICONF          | 0.14   | -0.076 | 0.194  | 0.0277        | 0.9061     |
| IDISP          | 1.056  | 1.056  | 1.482  | 0.0169        | 0.8908     |
| IL16           | 0.377  | -0.29  | 0.432  | 0.0021        | 1.0912     |
| INV24          | 0.575  | -0.068 | 0.91   | 0.0165        | 0.7897     |
| ISO34          | 0.73   | -0.439 | 0.951  | 0.0647        | 0.9594     |
| ISOL24         | 1.626  | -0.585 | 2.209  | 0.0774        | 0.9203     |
| MB16-43        | 8.673  | -7.092 | 13.815 | 0.0302        | 0.7847     |
| MCONF          | 0.184  | 0.115  | 0.204  | 0.0715        | 1.1234     |
| NBPRC          | 1.058  | 0.611  | 1.239  | 0.0098        | 1.067      |
| PA26           | 4.272  | 4.272  | 4.494  | 0.0223        | 1.1883     |
| PAREL          | 0.553  | -0.115 | 0.867  | 0.0908        | 0.7978     |
| PCONF21        | 0.279  | -0.139 | 0.351  | 0.1175        | 0.994      |
| PNICO23        | 0.31   | -0.308 | 0.35   | 0.0634        | 1.1096     |
| PX13           | 1.373  | -1.327 | 1.545  | 0.0203        | 1.1109     |
| RC21           | 3.345  | -2.929 | 6.416  | 0.0747        | 0.6516     |
| RG18           | 0.156  | 0.08   | 0.198  | 0.1833        | 0.9818     |
| RSE43          | 0.792  | 0.726  | 1.553  | 0.1701        | 0.6375     |
| S22            | 0.088  | 0.036  | 0.115  | 0.0101        | 0.9621     |
| S66            | 0.087  | 0.03   | 0.121  | 0.04          | 0.9049     |
| SCONF          | 0.143  | -0.066 | 0.245  | 0.0201        | 0.7302     |
| SIE4X4         | 11.669 | 11.669 | 13.743 | 0.2102        | 1.0614     |
| TAUT15         | 0.338  | -0.008 | 0.425  | 0.0632        | 0.9945     |
| UPU23          | 0.551  | -0.042 | 0.744  | 0.0842        | 0.9267     |
| W4-11          | 2.39   | 0.374  | 3.382  | 0.0414        | 0.8836     |
| WATER27        | 2.652  | -2.189 | 6.19   | 0.0335        | 0.5355     |
| WCPT18         | 0.68   | -0.435 | 0.881  | 0.0133        | 0.9653     |
| YBDE18         | 1.416  | 0.225  | 1.838  | 0.0196        | 0.9627     |
| <b>GMTKN55</b> |        |        |        | <b>2.7583</b> |            |

Table S7: MAD, MSD and RMSD as well as breakdown of total WTMAD2 by each subset for DSD-PBEedRPA75-D3BJ

| subs.name      | MAD   | MSD    | RSMD   | dWTMAD2       | 5MAD/4RMSD |
|----------------|-------|--------|--------|---------------|------------|
| ACONF          | 0.023 | 0.023  | 0.03   | 0.0072        | 0.9599     |
| ADIM6          | 0.104 | -0.104 | 0.111  | 0.0071        | 1.1809     |
| AHB21          | 0.343 | -0.319 | 0.456  | 0.0122        | 0.942      |
| AL2X6          | 0.425 | 0.22   | 0.528  | 0.0027        | 1.0051     |
| ALK8           | 2.964 | 1.399  | 3.847  | 0.0144        | 0.963      |
| ALKBDE10       | 4.275 | -4.275 | 5.179  | 0.0161        | 1.0318     |
| AMINO20X4      | 0.103 | -0.035 | 0.133  | 0.1277        | 0.962      |
| BH76RC         | 0.781 | 0.097  | 0.929  | 0.0416        | 1.0499     |
| BH76           | 0.925 | 0.512  | 1.899  | 0.1435        | 0.6093     |
| BHDIV10        | 0.551 | -0.279 | 0.656  | 0.0046        | 1.0504     |
| BHPERI         | 0.44  | -0.217 | 0.55   | 0.0208        | 0.9984     |
| BHROT27        | 0.081 | 0.063  | 0.11   | 0.0133        | 0.9256     |
| BSR36          | 1.134 | -1.134 | 1.202  | 0.0957        | 1.1793     |
| BUT14DIOL      | 0.034 | 0.009  | 0.045  | 0.0296        | 0.9533     |
| C60ISO         | 3.249 | -2.261 | 4.229  | 0.0113        | 0.9604     |
| CARBHB12       | 0.168 | 0.118  | 0.21   | 0.0127        | 1.0022     |
| CDIE20         | 0.285 | 0.252  | 0.407  | 0.0535        | 0.8765     |
| CHB6           | 1.429 | -1.429 | 1.738  | 0.0122        | 1.0274     |
| DARC           | 0.666 | -0.645 | 0.94   | 0.0109        | 0.8859     |
| DC13           | 1.906 | -0.191 | 3.023  | 0.0171        | 0.788      |
| DIPCS10        | 2.345 | 1.173  | 3.225  | 0.0014        | 0.9089     |
| FH51           | 0.922 | 0.053  | 1.214  | 0.0575        | 0.9486     |
| G21EA          | 1.971 | -1.148 | 2.434  | 0.0556        | 1.0124     |
| G21IP          | 2.155 | 1.378  | 2.973  | 0.0114        | 0.9061     |
| G2RC           | 1.953 | -0.235 | 2.692  | 0.0362        | 0.9069     |
| HAL59          | 0.206 | -0.038 | 0.271  | 0.1007        | 0.9509     |
| HEAVY28        | 0.135 | -0.05  | 0.154  | 0.1152        | 1.0929     |
| HEAVYSB11      | 0.802 | -0.042 | 0.918  | 0.0058        | 1.0923     |
| ICONF          | 0.127 | -0.002 | 0.16   | 0.0251        | 0.9964     |
| IDISP          | 0.604 | 0.576  | 0.849  | 0.0097        | 0.8889     |
| IL16           | 0.353 | -0.279 | 0.428  | 0.002         | 1.0296     |
| INV24          | 0.571 | 0.299  | 0.842  | 0.0164        | 0.8485     |
| ISO34          | 0.593 | -0.291 | 0.765  | 0.0525        | 0.9685     |
| ISOL24         | 0.814 | -0.011 | 1.221  | 0.0387        | 0.8332     |
| MB16-43        | 7.603 | -2.351 | 13.479 | 0.0265        | 0.705      |
| MCONF          | 0.157 | 0.109  | 0.175  | 0.0611        | 1.12       |
| NBPRC          | 0.653 | -0.057 | 0.788  | 0.006         | 1.0357     |
| PA26           | 4.49  | 4.49   | 4.706  | 0.0234        | 1.1926     |
| PAREL          | 0.408 | 0.103  | 0.682  | 0.0669        | 0.748      |
| PCONF21        | 0.194 | -0.086 | 0.233  | 0.0819        | 1.0434     |
| PNICO23        | 0.168 | -0.16  | 0.207  | 0.0343        | 1.0125     |
| PX13           | 0.864 | -0.728 | 1.057  | 0.0128        | 1.0224     |
| RC21           | 2.333 | -1.816 | 5.093  | 0.0521        | 0.5727     |
| RG18           | 0.139 | 0.044  | 0.171  | 0.1637        | 1.0129     |
| RSE43          | 0.73  | 0.711  | 1.39   | 0.1568        | 0.6568     |
| S22            | 0.145 | 0.094  | 0.221  | 0.0166        | 0.8185     |
| S66            | 0.155 | 0.065  | 0.219  | 0.071         | 0.8851     |
| SCONF          | 0.118 | -0.059 | 0.188  | 0.0166        | 0.7865     |
| SIE4X4         | 8.949 | 8.949  | 10.644 | 0.1612        | 1.0509     |
| TAUT15         | 0.316 | 0.062  | 0.366  | 0.0591        | 1.0804     |
| UPU23          | 0.479 | 0.089  | 0.663  | 0.0732        | 0.9044     |
| W4-11          | 2.429 | -1.252 | 3.607  | 0.0421        | 0.8418     |
| WATER27        | 3.331 | -2.254 | 7.304  | 0.0421        | 0.57       |
| WCPT18         | 0.843 | 0.169  | 1.01   | 0.0165        | 1.043      |
| YBDE18         | 0.762 | 0.62   | 1.019  | 0.0106        | 0.9351     |
| <b>GMTKN55</b> |       |        |        | <b>2.3768</b> |            |



Table S8: MAD, MSD and RMSD as well as breakdown of total WTMAD2 by each subset for DSD-PBEP86dRPA75-D3BJ

| subs.name      | MAD   | MSD    | RSMD   | dWTMAD2       | 5MAD/4RMSD |
|----------------|-------|--------|--------|---------------|------------|
| ACONF          | 0.035 | 0.035  | 0.044  | 0.0108        | 0.9934     |
| ADIM6          | 0.047 | -0.047 | 0.058  | 0.0032        | 1.0245     |
| AHB21          | 0.368 | -0.346 | 0.469  | 0.0131        | 0.9813     |
| AL2X6          | 0.443 | -0.157 | 0.526  | 0.0028        | 1.0542     |
| ALK8           | 2.94  | 0.822  | 3.696  | 0.0143        | 0.9944     |
| ALKBDE10       | 4.416 | -4.416 | 5.257  | 0.0167        | 1.05       |
| AMINO20X4      | 0.108 | -0.035 | 0.142  | 0.1345        | 0.9492     |
| BH76RC         | 0.873 | 0.01   | 1.02   | 0.0465        | 1.0702     |
| BH76           | 0.885 | 0.344  | 1.767  | 0.1375        | 0.6264     |
| BHDIV10        | 0.492 | -0.185 | 0.636  | 0.0041        | 0.966      |
| BHPERI         | 0.374 | -0.108 | 0.455  | 0.0177        | 1.0291     |
| BHROT27        | 0.078 | 0.049  | 0.103  | 0.0128        | 0.9458     |
| BSR36          | 1.376 | -1.376 | 1.498  | 0.1163        | 1.1477     |
| BUT14DIOL      | 0.04  | 0.03   | 0.052  | 0.035         | 0.9679     |
| C60ISO         | 3.185 | -2.221 | 4.147  | 0.0111        | 0.9599     |
| CARBHB12       | 0.186 | 0.134  | 0.228  | 0.0141        | 1.0209     |
| CDIE20         | 0.279 | 0.243  | 0.402  | 0.0524        | 0.8675     |
| CHB6           | 1.409 | -1.409 | 1.704  | 0.012         | 1.0341     |
| DARC           | 0.482 | -0.304 | 0.724  | 0.0079        | 0.8329     |
| DC13           | 2.103 | -0.058 | 3.137  | 0.0189        | 0.8379     |
| DIPCS10        | 2.389 | 1.313  | 3.334  | 0.0014        | 0.8956     |
| FH51           | 0.923 | 0.097  | 1.223  | 0.0577        | 0.944      |
| G21EA          | 1.791 | -0.872 | 2.21   | 0.0506        | 1.0131     |
| G21IP          | 2.141 | 1.403  | 2.881  | 0.0114        | 0.9289     |
| G2RC           | 1.852 | -0.259 | 2.529  | 0.0343        | 0.9152     |
| HAL59          | 0.201 | -0.012 | 0.256  | 0.0984        | 0.9823     |
| HEAVY28        | 0.132 | -0.037 | 0.155  | 0.113         | 1.0659     |
| HEAVYSB11      | 0.886 | -0.485 | 1.071  | 0.0064        | 1.0338     |
| ICONF          | 0.143 | -0.011 | 0.169  | 0.0282        | 1.053      |
| IDISP          | 0.655 | 0.655  | 0.803  | 0.0105        | 1.0191     |
| IL16           | 0.342 | -0.25  | 0.419  | 0.0019        | 1.0207     |
| INV24          | 0.551 | 0.277  | 0.822  | 0.0158        | 0.8377     |
| ISO34          | 0.59  | -0.299 | 0.772  | 0.0523        | 0.9547     |
| ISOL24         | 0.877 | -0.1   | 1.334  | 0.0418        | 0.8215     |
| MB16-43        | 8.339 | -4.67  | 14.703 | 0.0291        | 0.709      |
| MCONF          | 0.13  | 0.086  | 0.145  | 0.0505        | 1.1168     |
| NBPRC          | 0.653 | -0.014 | 0.843  | 0.006         | 0.9675     |
| PA26           | 4.251 | 4.251  | 4.482  | 0.0222        | 1.1857     |
| PAREL          | 0.419 | 0.082  | 0.681  | 0.0688        | 0.7695     |
| PCONF21        | 0.175 | -0.102 | 0.218  | 0.0739        | 1.0042     |
| PNICO23        | 0.179 | -0.17  | 0.223  | 0.0365        | 1.0009     |
| PX13           | 0.79  | -0.601 | 0.961  | 0.0117        | 1.0278     |
| RC21           | 2.287 | -1.824 | 5.173  | 0.0511        | 0.5525     |
| RG18           | 0.145 | 0.083  | 0.185  | 0.1709        | 0.9808     |
| RSE43          | 0.638 | 0.613  | 1.172  | 0.1373        | 0.6809     |
| S22            | 0.174 | 0.109  | 0.252  | 0.0199        | 0.8624     |
| S66            | 0.173 | 0.101  | 0.249  | 0.0793        | 0.8659     |
| SCONF          | 0.116 | -0.082 | 0.173  | 0.0163        | 0.8414     |
| SIE4X4         | 8.994 | 8.994  | 10.763 | 0.1622        | 1.0446     |
| TAUT15         | 0.292 | 0.052  | 0.341  | 0.0547        | 1.0708     |
| UPU23          | 0.481 | 0.09   | 0.668  | 0.0735        | 0.899      |
| W4-11          | 2.668 | -1.568 | 3.884  | 0.0463        | 0.8586     |
| WATER27        | 1.221 | 1.221  | 1.558  | 0.0164        | 0.9791     |
| WCPT18         | 0.861 | 0.249  | 1.03   | 0.0168        | 1.0448     |
| YBDE18         | 0.705 | 0.248  | 0.884  | 0.0098        | 0.997      |
| <b>GMTKN55</b> |       |        |        | <b>2.3588</b> |            |

Table S9: MAD, MSD and RMSD as well as breakdown of total WTMAD2 by each subset for DSD-PBErPA75-D4

| subs.name      | MAD   | MSD    | RSMD   | dWTMAD2       | 5MAD/4RMSD |
|----------------|-------|--------|--------|---------------|------------|
| ACONF          | 0.033 | 0.032  | 0.044  | 0.0102        | 0.9243     |
| ADIM6          | 0.31  | -0.31  | 0.343  | 0.021         | 1.1302     |
| AHB21          | 0.335 | -0.305 | 0.442  | 0.0119        | 0.9484     |
| AL2X6          | 0.374 | -0.263 | 0.44   | 0.0024        | 1.0637     |
| ALK8           | 1.833 | -0.418 | 2.42   | 0.0089        | 0.9464     |
| ALKBDE10       | 4.281 | -4.281 | 5.288  | 0.0161        | 1.0121     |
| AMINO20X4      | 0.128 | -0.057 | 0.172  | 0.1588        | 0.929      |
| BH76RC         | 0.834 | 0.02   | 0.96   | 0.0444        | 1.0859     |
| BH76           | 0.977 | 0.616  | 1.94   | 0.1515        | 0.6299     |
| BHDIV10        | 0.409 | -0.15  | 0.561  | 0.0034        | 0.9117     |
| BHPERI         | 0.492 | -0.093 | 0.566  | 0.0233        | 1.0873     |
| BHROT27        | 0.085 | 0.057  | 0.109  | 0.014         | 0.9811     |
| BSR36          | 0.548 | -0.541 | 0.579  | 0.0462        | 1.1827     |
| BUT14DIOL      | 0.046 | 0.044  | 0.059  | 0.0402        | 0.9828     |
| C60ISO         | 3.661 | -3.234 | 5.005  | 0.0127        | 0.9144     |
| CARBHB12       | 0.136 | 0.059  | 0.179  | 0.0103        | 0.9504     |
| CDIE20         | 0.359 | 0.33   | 0.461  | 0.0672        | 0.9732     |
| CHB6           | 1.482 | -1.482 | 1.839  | 0.0126        | 1.0075     |
| DARC           | 0.656 | -0.627 | 0.879  | 0.0107        | 0.9329     |
| DC13           | 2.129 | 0.358  | 2.92   | 0.0191        | 0.9112     |
| DIPCS10        | 2.821 | 2.168  | 3.669  | 0.0016        | 0.9611     |
| FH51           | 0.858 | 0.094  | 1.145  | 0.0536        | 0.9364     |
| G21EA          | 1.704 | -0.609 | 2.234  | 0.0481        | 0.9536     |
| G21IP          | 2.389 | 1.836  | 3.212  | 0.0127        | 0.9297     |
| G2RC           | 1.852 | -0.201 | 2.493  | 0.0343        | 0.9286     |
| HAL59          | 0.27  | 0.141  | 0.345  | 0.1318        | 0.9791     |
| HEAVY28        | 0.146 | 0      | 0.191  | 0.1249        | 0.9565     |
| HEAVYSB11      | 1.226 | 0.16   | 1.349  | 0.0088        | 1.1354     |
| ICONF          | 0.175 | -0.056 | 0.202  | 0.0345        | 1.0805     |
| IDISP          | 0.745 | 0.349  | 0.895  | 0.0119        | 1.041      |
| IL16           | 0.361 | -0.346 | 0.403  | 0.002         | 1.1197     |
| INV24          | 0.567 | -0.027 | 0.781  | 0.0162        | 0.9071     |
| ISO34          | 0.631 | -0.355 | 0.79   | 0.0559        | 0.9994     |
| ISOL24         | 0.76  | -0.066 | 1.102  | 0.0362        | 0.8621     |
| MB16-43        | 7.135 | -3.526 | 13.303 | 0.0249        | 0.6704     |
| MCONF          | 0.067 | -0.006 | 0.095  | 0.026         | 0.8753     |
| NBPRC          | 0.803 | 0.277  | 0.851  | 0.0074        | 1.1793     |
| PA26           | 3.919 | 3.919  | 4.131  | 0.0205        | 1.1857     |
| PAREL          | 0.429 | 0.163  | 0.715  | 0.0703        | 0.7501     |
| PCONF21        | 0.155 | -0.092 | 0.2    | 0.0651        | 0.9643     |
| PNICO23        | 0.121 | -0.061 | 0.145  | 0.0247        | 1.0373     |
| PX13           | 0.888 | -0.612 | 1.049  | 0.0131        | 1.0585     |
| RC21           | 2.42  | -2.026 | 5.273  | 0.0541        | 0.5737     |
| RG18           | 0.113 | 0.049  | 0.147  | 0.1336        | 0.9647     |
| RSE43          | 0.711 | 0.675  | 1.366  | 0.1526        | 0.6503     |
| S22            | 0.131 | 0.057  | 0.195  | 0.015         | 0.8438     |
| S66            | 0.177 | -0.009 | 0.236  | 0.081         | 0.9364     |
| SCONF          | 0.129 | -0.117 | 0.192  | 0.0181        | 0.8393     |
| SIE4X4         | 9.028 | 9.028  | 10.79  | 0.1626        | 1.0458     |
| TAUT15         | 0.269 | 0.056  | 0.319  | 0.0502        | 1.0535     |
| UPU23          | 0.455 | 0.163  | 0.596  | 0.0694        | 0.9545     |
| W4-11          | 2.438 | -1.203 | 3.63   | 0.0422        | 0.8395     |
| WATER27        | 0.667 | -0.184 | 0.941  | 0.0084        | 0.8871     |
| WCPT18         | 0.749 | 0.319  | 0.926  | 0.0146        | 1.0111     |
| YBDE18         | 0.681 | 0.225  | 0.864  | 0.0094        | 0.985      |
| <b>GMTKN55</b> |       |        |        | <b>2.3211</b> |            |

Table S10: MAD, MSD and RMSD as well as breakdown of total WTMAD2 by each subset for DSD-PBEP86dRPA75-D4

| subs.name      | MAD   | MSD    | RSMD   | dWTMAD2       | 5MAD/4RMSD |
|----------------|-------|--------|--------|---------------|------------|
| ACONF          | 0.043 | 0.043  | 0.056  | 0.0132        | 0.9519     |
| ADIM6          | 0.249 | -0.249 | 0.281  | 0.0169        | 1.1069     |
| AHB21          | 0.345 | -0.32  | 0.441  | 0.0123        | 0.9793     |
| AL2X6          | 0.355 | -0.185 | 0.39   | 0.0023        | 1.138      |
| ALK8           | 2.098 | -0.721 | 2.89   | 0.0102        | 0.9075     |
| ALKBDE10       | 4.246 | -4.246 | 5.165  | 0.016         | 1.0276     |
| AMINO20X4      | 0.134 | -0.058 | 0.182  | 0.1665        | 0.9179     |
| BH76RC         | 0.927 | -0.055 | 1.074  | 0.0494        | 1.0789     |
| BH76           | 0.938 | 0.449  | 1.806  | 0.1457        | 0.6493     |
| BHDIV10        | 0.358 | -0.066 | 0.558  | 0.003         | 0.8021     |
| BHPERI         | 0.425 | -0.004 | 0.489  | 0.0201        | 1.0853     |
| BHROT27        | 0.082 | 0.048  | 0.105  | 0.0135        | 0.983      |
| BSR36          | 0.701 | -0.701 | 0.725  | 0.0592        | 1.2086     |
| BUT14DIOL      | 0.061 | 0.059  | 0.073  | 0.0526        | 1.035      |
| C60ISO         | 3.505 | -3.026 | 4.769  | 0.0122        | 0.9188     |
| CARBHB12       | 0.15  | 0.071  | 0.197  | 0.0114        | 0.9544     |
| CDIE20         | 0.344 | 0.312  | 0.446  | 0.0645        | 0.9648     |
| CHB6           | 1.546 | -1.546 | 1.897  | 0.0132        | 1.0185     |
| DARC           | 0.462 | -0.262 | 0.656  | 0.0076        | 0.8807     |
| DC13           | 2.102 | 0.282  | 2.989  | 0.0189        | 0.8792     |
| DIPCS10        | 2.675 | 2.016  | 3.63   | 0.0016        | 0.9212     |
| FH51           | 0.867 | 0.162  | 1.151  | 0.0542        | 0.9416     |
| G21EA          | 1.628 | -0.442 | 2.089  | 0.046         | 0.9742     |
| G21IP          | 2.305 | 1.737  | 3.067  | 0.0122        | 0.9393     |
| G2RC           | 1.805 | -0.127 | 2.466  | 0.0335        | 0.915      |
| HAL59          | 0.288 | 0.189  | 0.373  | 0.1406        | 0.9655     |
| HEAVY28        | 0.153 | -0.003 | 0.206  | 0.131         | 0.9271     |
| HEAVYSB11      | 1.317 | 0.244  | 1.447  | 0.0095        | 1.1382     |
| ICONF          | 0.182 | -0.046 | 0.213  | 0.0361        | 1.0728     |
| IDISP          | 0.737 | 0.422  | 0.863  | 0.0118        | 1.0675     |
| IL16           | 0.318 | -0.3   | 0.361  | 0.0018        | 1.103      |
| INV24          | 0.572 | -0.002 | 0.794  | 0.0164        | 0.9004     |
| ISO34          | 0.606 | -0.346 | 0.786  | 0.0537        | 0.9631     |
| ISOL24         | 0.828 | -0.141 | 1.21   | 0.0395        | 0.8549     |
| MB16-43        | 6.848 | -3.144 | 13.099 | 0.0239        | 0.6535     |
| MCONF          | 0.058 | -0.004 | 0.086  | 0.0225        | 0.8361     |
| NBPRC          | 0.795 | 0.3    | 0.828  | 0.0073        | 1.1999     |
| PA26           | 3.661 | 3.661  | 3.89   | 0.0191        | 1.1765     |
| PAREL          | 0.431 | 0.138  | 0.708  | 0.0707        | 0.7606     |
| PCONF21        | 0.155 | -0.101 | 0.207  | 0.0656        | 0.9402     |
| PNICO23        | 0.114 | -0.041 | 0.138  | 0.0233        | 1.03       |
| PX13           | 0.794 | -0.426 | 0.927  | 0.0118        | 1.0714     |
| RC21           | 2.4   | -2.039 | 5.339  | 0.0537        | 0.562      |
| RG18           | 0.12  | 0.085  | 0.162  | 0.1422        | 0.9285     |
| RSE43          | 0.625 | 0.582  | 1.154  | 0.1345        | 0.6773     |
| S22            | 0.147 | 0.065  | 0.215  | 0.0168        | 0.8538     |
| S66            | 0.188 | 0.023  | 0.246  | 0.0864        | 0.9583     |
| SCONF          | 0.142 | -0.138 | 0.19   | 0.0199        | 0.9348     |
| SIE4X4         | 8.946 | 8.946  | 10.766 | 0.1614        | 1.0387     |
| TAUT15         | 0.245 | 0.05   | 0.297  | 0.0459        | 1.0292     |
| UPU23          | 0.45  | 0.135  | 0.613  | 0.0688        | 0.9182     |
| W4-11          | 2.679 | -1.491 | 3.889  | 0.0465        | 0.8612     |
| WATER27        | 0.521 | 0.502  | 0.683  | 0.007         | 0.9541     |
| WCPT18         | 0.784 | 0.431  | 0.976  | 0.0153        | 1.0044     |
| YBDE18         | 0.687 | 0.001  | 0.832  | 0.0095        | 1.0318     |
| <b>GMTKN55</b> |       |        |        | <b>2.3487</b> |            |

Table S11: MAD, MSD and RMSD as well as breakdown of total WTMAD2 by each subset for optSCS-dRPA75-D4

| subs.name      | MAD    | MSD    | RSMD   | dWTMAD2       | 5MAD/4RMSD |
|----------------|--------|--------|--------|---------------|------------|
| ACONF          | 0.031  | 0.03   | 0.046  | 0.0098        | 0.8459     |
| ADIM6          | 0.134  | -0.134 | 0.153  | 0.0091        | 1.0882     |
| AHB21          | 0.185  | -0.106 | 0.269  | 0.0065        | 0.8575     |
| AL2X6          | 0.883  | -0.883 | 0.942  | 0.0056        | 1.1712     |
| ALK8           | 2.171  | -1.253 | 3.015  | 0.0105        | 0.9001     |
| ALKBDE10       | 3.404  | -2.362 | 4.172  | 0.0128        | 1.02       |
| AMINO20X4      | 0.155  | -0.079 | 0.21   | 0.1934        | 0.9242     |
| BH76RC         | 0.96   | 0.371  | 1.297  | 0.0511        | 0.9247     |
| BH76           | 1.182  | -0.015 | 2.044  | 0.1832        | 0.7225     |
| BHDIV10        | 0.942  | -0.751 | 1.151  | 0.0079        | 1.0231     |
| BHPERI         | 1.04   | -1.04  | 1.143  | 0.0492        | 1.1376     |
| BHROT27        | 0.113  | -0.065 | 0.168  | 0.0184        | 0.8375     |
| BSR36          | 0.197  | -0.079 | 0.235  | 0.0166        | 1.0492     |
| BUT14DIOL      | 0.045  | 0.039  | 0.057  | 0.0393        | 0.9902     |
| C60ISO         | 6.848  | -6.848 | 8.765  | 0.0238        | 0.9767     |
| CARBHB12       | 0.113  | -0.03  | 0.171  | 0.0085        | 0.8286     |
| CDIE20         | 0.304  | 0.28   | 0.365  | 0.057         | 1.0432     |
| CHB6           | 1.153  | -1.153 | 1.637  | 0.0098        | 0.8801     |
| DARC           | 1.229  | 1.229  | 1.371  | 0.0201        | 1.1213     |
| DC13           | 2.976  | 1.499  | 3.706  | 0.0267        | 1.0037     |
| DIPCS10        | 2.701  | 2.533  | 3.356  | 0.0016        | 1.0062     |
| FH51           | 1.218  | 0.892  | 1.647  | 0.076         | 0.9242     |
| G21EA          | 1.811  | 0.149  | 2.271  | 0.0511        | 0.9965     |
| G21IP          | 2.466  | 1.916  | 3.326  | 0.0131        | 0.9268     |
| G2RC           | 1.963  | 1.189  | 2.628  | 0.0363        | 0.9338     |
| HAL59          | 0.272  | 0.178  | 0.345  | 0.1326        | 0.986      |
| HEAVY28        | 0.177  | -0.03  | 0.216  | 0.1513        | 1.0222     |
| HEAVYSB11      | 0.926  | -0.094 | 1.051  | 0.0067        | 1.1021     |
| ICONF          | 0.182  | -0.099 | 0.232  | 0.0359        | 0.9808     |
| IDISP          | 0.949  | 0.817  | 1.459  | 0.0152        | 0.8134     |
| IL16           | 0.612  | -0.612 | 0.654  | 0.0034        | 1.1684     |
| INV24          | 0.697  | -0.316 | 0.981  | 0.0199        | 0.888      |
| ISO34          | 0.729  | -0.454 | 0.959  | 0.0646        | 0.9503     |
| ISOL24         | 1.462  | -0.427 | 2.063  | 0.0696        | 0.8859     |
| MB16-43        | 7.063  | -5.348 | 13.044 | 0.0246        | 0.6768     |
| MCONF          | 0.074  | 0.017  | 0.091  | 0.0288        | 1.0222     |
| NBPRC          | 1.087  | 0.72   | 1.215  | 0.01          | 1.1183     |
| PA26           | 3.687  | 3.687  | 3.898  | 0.0193        | 1.1822     |
| PAREL          | 0.527  | -0.063 | 0.845  | 0.0865        | 0.7797     |
| PCONF21        | 0.263  | -0.196 | 0.371  | 0.1109        | 0.8864     |
| PNICO23        | 0.15   | -0.134 | 0.194  | 0.0306        | 0.9646     |
| PX13           | 1.34   | -1.285 | 1.509  | 0.0198        | 1.1104     |
| RC21           | 3.333  | -2.881 | 6.391  | 0.0745        | 0.652      |
| RG18           | 0.143  | 0.097  | 0.197  | 0.169         | 0.9081     |
| RSE43          | 0.796  | 0.724  | 1.554  | 0.171         | 0.6406     |
| S22            | 0.122  | 0.025  | 0.17   | 0.014         | 0.8987     |
| S66            | 0.149  | 0.002  | 0.19   | 0.0682        | 0.9772     |
| SCONF          | 0.121  | -0.065 | 0.189  | 0.017         | 0.8034     |
| SIE4X4         | 11.636 | 11.636 | 13.732 | 0.2096        | 1.0593     |
| TAUT15         | 0.317  | 0.041  | 0.386  | 0.0593        | 1.0272     |
| UPU23          | 0.474  | -0.025 | 0.653  | 0.0723        | 0.9069     |
| W4-11          | 2.384  | 0.164  | 3.353  | 0.0413        | 0.8888     |
| WATER27        | 0.42   | 0.059  | 0.514  | 0.0053        | 1.0218     |
| WCPT18         | 0.668  | -0.409 | 0.856  | 0.0131        | 0.9756     |
| YBDE18         | 1.311  | 0.388  | 1.793  | 0.0182        | 0.9139     |
| <b>GMTKN55</b> |        |        |        | <b>2.7001</b> |            |

Table S12: MAD, MSD and RMSD as well as breakdown of total WTMAD2 by each subset for SCS-dRPA75-D4

| subs.name      | MAD   | MSD    | RSMD   | dWTMAD2       | 5MAD/4RMSD |
|----------------|-------|--------|--------|---------------|------------|
| ACONF          | 0.025 | 0.017  | 0.034  | 0.0077        | 0.8971     |
| ADIM6          | 0.129 | -0.129 | 0.152  | 0.0088        | 1.0592     |
| AHB21          | 0.171 | -0.064 | 0.263  | 0.006         | 0.8122     |
| AL2X6          | 1.257 | -1.257 | 1.314  | 0.008         | 1.196      |
| ALK8           | 2.358 | -1.426 | 3.096  | 0.0114        | 0.952      |
| ALKBDE10       | 2.756 | -0.147 | 3.383  | 0.0104        | 1.0185     |
| AMINO20X4      | 0.161 | -0.087 | 0.218  | 0.2008        | 0.9234     |
| BH76RC         | 1.079 | 0.191  | 1.383  | 0.0574        | 0.975      |
| BH76           | 1.241 | 0.099  | 2.234  | 0.1923        | 0.6941     |
| BHDIV10        | 0.897 | -0.611 | 1.084  | 0.0075        | 1.0341     |
| BHPERI         | 0.852 | -0.852 | 0.971  | 0.0403        | 1.0975     |
| BHROT27        | 0.114 | -0.08  | 0.178  | 0.0187        | 0.8058     |
| BSR36          | 0.235 | -0.133 | 0.268  | 0.0198        | 1.096      |
| BUT14DIOL      | 0.052 | 0.046  | 0.063  | 0.045         | 1.0329     |
| C60ISO         | 6.953 | -6.953 | 8.87   | 0.0242        | 0.9799     |
| CARBHB12       | 0.11  | -0.043 | 0.176  | 0.0083        | 0.7835     |
| CDIE20         | 0.313 | 0.286  | 0.374  | 0.0585        | 1.0437     |
| CHB6           | 1.149 | -1.149 | 1.624  | 0.0098        | 0.8844     |
| DARC           | 1.574 | 1.574  | 1.66   | 0.0258        | 1.1854     |
| DC13           | 3.186 | 1.112  | 3.896  | 0.0286        | 1.0221     |
| DIPCS10        | 2.646 | 2.428  | 3.282  | 0.0015        | 1.0076     |
| FH51           | 1.25  | 0.955  | 1.676  | 0.078         | 0.9324     |
| G21EA          | 2.595 | 0.612  | 3.169  | 0.0732        | 1.0234     |
| G21IP          | 3.054 | 2.357  | 4.029  | 0.0162        | 0.9474     |
| G2RC           | 1.868 | 1.213  | 2.565  | 0.0346        | 0.9103     |
| HAL59          | 0.255 | 0.158  | 0.322  | 0.1246        | 0.9907     |
| HEAVY28        | 0.161 | 0.002  | 0.199  | 0.1382        | 1.016      |
| HEAVYSB11      | 1.316 | 1.316  | 1.669  | 0.0095        | 0.9862     |
| ICONF          | 0.19  | -0.12  | 0.242  | 0.0375        | 0.9817     |
| IDISP          | 1.041 | 0.88   | 1.481  | 0.0167        | 0.8785     |
| IL16           | 0.516 | -0.516 | 0.565  | 0.0029        | 1.1414     |
| INV24          | 0.721 | -0.34  | 1      | 0.0206        | 0.9015     |
| ISO34          | 0.751 | -0.471 | 0.985  | 0.0665        | 0.9525     |
| ISOL24         | 1.522 | -0.545 | 2.124  | 0.0725        | 0.8954     |
| MB16-43        | 7.236 | -4.89  | 13.578 | 0.0252        | 0.6662     |
| MCONF          | 0.066 | -0.006 | 0.093  | 0.0256        | 0.8798     |
| NBPRC          | 1.207 | 0.818  | 1.318  | 0.0111        | 1.1442     |
| PA26           | 3.761 | 3.761  | 3.982  | 0.0196        | 1.1804     |
| PAREL          | 0.528 | -0.076 | 0.857  | 0.0865        | 0.7698     |
| PCONF21        | 0.261 | -0.19  | 0.367  | 0.1101        | 0.8906     |
| PNICO23        | 0.183 | -0.164 | 0.244  | 0.0374        | 0.9387     |
| PX13           | 1.26  | -1.188 | 1.439  | 0.0186        | 1.0946     |
| RC21           | 3.284 | -2.974 | 6.349  | 0.0734        | 0.6467     |
| RG18           | 0.142 | 0.102  | 0.195  | 0.1676        | 0.9098     |
| RSE43          | 0.825 | 0.73   | 1.688  | 0.1773        | 0.6112     |
| S22            | 0.097 | 0.047  | 0.149  | 0.0111        | 0.8144     |
| S66            | 0.125 | 0.016  | 0.166  | 0.0573        | 0.9387     |
| SCONF          | 0.135 | -0.09  | 0.218  | 0.0189        | 0.7743     |
| SIE4X4         | 9.611 | 9.611  | 11.323 | 0.1731        | 1.061      |
| TAUT15         | 0.302 | 0      | 0.387  | 0.0565        | 0.9768     |
| UPU23          | 0.465 | 0.015  | 0.641  | 0.0709        | 0.9066     |
| W4-11          | 8.565 | 8.179  | 10.242 | 0.1483        | 1.0454     |
| WATER27        | 0.535 | -0.19  | 0.699  | 0.0068        | 0.9566     |
| WCPT18         | 0.615 | -0.323 | 0.788  | 0.012         | 0.9758     |
| YBDE18         | 2.657 | 1.537  | 3.161  | 0.0368        | 1.0507     |
| <b>GMTKN55</b> |       |        |        | <b>2.8262</b> |            |

Table S13: MAD, MSD and RMSD as well as breakdown of total WTMAD2 by each subset for  $\omega$ DSD3-PBEP86-D3BJ

| subs.name      | Nsys        | Nskip     | MAD   | MSD    | RMSD  | dWTMAD2       | 5MAD/4RMSD |
|----------------|-------------|-----------|-------|--------|-------|---------------|------------|
| ACONF          | 15          | 0         | 0.017 | 0.007  | 0.02  | 0.0055        | 1.056      |
| ADIM6          | 6           | 0         | 0.02  | -0.004 | 0.024 | 0.0014        | 1.0353     |
| AHB21          | 21          | 0         | 0.17  | -0.143 | 0.262 | 0.0062        | 0.8119     |
| AL2X6          | 6           | 0         | 0.278 | -0.238 | 0.321 | 0.0018        | 1.0827     |
| ALK8           | 8           | 0         | 1.435 | 0.747  | 1.877 | 0.0072        | 0.9559     |
| ALKBDE10       | 10          | 0         | 3.097 | -2.998 | 4.011 | 0.0121        | 0.9652     |
| AMINO20X4      | 80          | 0         | 0.091 | -0.038 | 0.123 | 0.1176        | 0.9302     |
| BH76RC         | 30          | 0         | 0.624 | 0.223  | 0.84  | 0.0343        | 0.9293     |
| BH76           | 76          | 0         | 0.755 | -0.128 | 1.293 | 0.1209        | 0.73       |
| BHDIV10        | 10          | 0         | 0.717 | -0.44  | 0.838 | 0.0062        | 1.0692     |
| BHPERI         | 26          | 0         | 0.374 | 0.171  | 0.456 | 0.0183        | 1.0249     |
| BHROT27        | 27          | 0         | 0.074 | 0.034  | 0.1   | 0.0126        | 0.9284     |
| BSR36          | 36          | 0         | 0.708 | -0.708 | 0.781 | 0.0617        | 1.1335     |
| BUT14DIOL      | 64          | 0         | 0.046 | 0.02   | 0.057 | 0.0412        | 1.0022     |
| CARBHB12       | 12          | 0         | 0.287 | 0.287  | 0.353 | 0.0223        | 1.0152     |
| CDIE20         | 20          | 0         | 0.168 | 0.12   | 0.274 | 0.0325        | 0.7675     |
| CHB6           | 6           | 0         | 1.083 | -1.083 | 1.297 | 0.0095        | 1.044      |
| DARC           | 14          | 0         | 0.561 | 0.471  | 0.646 | 0.0095        | 1.0864     |
| DC13           | 13          | 0         | 2.464 | -0.031 | 3.297 | 0.0229        | 0.9343     |
| DIPCS10        | 10          | 0         | 4.941 | -4.941 | 5.1   | 0.003         | 1.2109     |
| FH51           | 51          | 0         | 0.662 | 0.128  | 0.862 | 0.0427        | 0.9602     |
| G21EA          | 25          | 0         | 2.707 | -2.707 | 3.013 | 0.0789        | 1.1229     |
| G21IP          | 36          | 0         | 2.09  | -1.455 | 2.477 | 0.0115        | 1.0543     |
| G2RC           | 25          | 0         | 1.422 | 0.357  | 2.146 | 0.0272        | 0.8281     |
| HAL59          | 59          | 0         | 0.228 | 0.039  | 0.285 | 0.1147        | 0.9988     |
| HEAVY28        | 28          | 0         | 0.087 | 0.022  | 0.124 | 0.0769        | 0.8785     |
| HEAVYSB11      | 11          | 0         | 1.216 | -1.216 | 1.369 | 0.009         | 1.1108     |
| ICONF          | 17          | 0         | 0.085 | 0.02   | 0.108 | 0.0173        | 0.9859     |
| IDISP          | 5           | 1         | 0.349 | 0.349  | 0.399 | 0.0041        | 1.0939     |
| IL16           | 16          | 0         | 0.333 | 0.282  | 0.426 | 0.0019        | 0.9772     |
| INV24          | 21          | 3         | 0.483 | 0.123  | 1.022 | 0.013         | 0.5906     |
| ISO34          | 34          | 0         | 0.304 | -0.205 | 0.446 | 0.0279        | 0.8536     |
| ISOL24         | 14          | 10        | 0.739 | -0.333 | 0.995 | 0.021         | 0.9276     |
| MB16-43        | 43          | 0         | 7.077 | -6.167 | 8.534 | 0.0255        | 1.0366     |
| MCONF          | 51          | 0         | 0.155 | 0.141  | 0.181 | 0.0625        | 1.0746     |
| NBPRC          | 6           | 0         | 0.372 | -0.197 | 0.437 | 0.0036        | 1.0657     |
| PA26           | 26          | 0         | 1.423 | 1.422  | 1.688 | 0.0077        | 1.0541     |
| PAREL          | 20          | 0         | 0.315 | -0.013 | 0.522 | 0.0533        | 0.7532     |
| PCONF21        | 18          | 0         | 0.165 | -0.082 | 0.196 | 0.0719        | 1.055      |
| PNICO23        | 23          | 0         | 0.119 | 0.089  | 0.168 | 0.0252        | 0.8902     |
| PX13           | 13          | 0         | 1.564 | -1.564 | 1.659 | 0.0239        | 1.1782     |
| RC21           | 21          | 0         | 0.714 | -0.292 | 0.93  | 0.0165        | 0.959      |
| RG18           | 18          | 0         | 0.073 | -0.03  | 0.095 | 0.089         | 0.9643     |
| RSE43          | 43          | 0         | 0.289 | 0.153  | 0.518 | 0.0641        | 0.6969     |
| S22            | 22          | 0         | 0.139 | -0.032 | 0.181 | 0.0164        | 0.955      |
| S66            | 66          | 0         | 0.12  | 0.037  | 0.156 | 0.0567        | 0.9603     |
| SCONF          | 17          | 0         | 0.122 | 0.014  | 0.184 | 0.0176        | 0.8253     |
| SIE4X4         | 16          | 0         | 5.157 | 5.157  | 5.886 | 0.096         | 1.0952     |
| TAUT15         | 15          | 0         | 0.417 | -0.173 | 0.5   | 0.0805        | 1.042      |
| W4-11          | 140         | 0         | 2.199 | -1.803 | 2.98  | 0.0394        | 0.9225     |
| WATER27        | 23          | 4         | 0.742 | 0.722  | 0.837 | 0.0113        | 1.1085     |
| WCPT18         | 18          | 0         | 0.989 | -0.793 | 1.185 | 0.02          | 1.0431     |
| YBDE18         | 18          | 0         | 0.614 | -0.354 | 0.755 | 0.0088        | 1.0161     |
| <b>GMTKN55</b> | <b>1449</b> | <b>50</b> |       |        |       | <b>1.7826</b> |            |

Table S14: MAD, MSD and RMSD as well as breakdown of total WTMAD2 by each subset for  $\omega$ DSD3-PBEP86-D4

| subs.name      | Nsys        | Nskip     | MAD   | MSD    | RMSD   | dWTMAD2       | 5MAD/4RMSD |
|----------------|-------------|-----------|-------|--------|--------|---------------|------------|
| ACONF          | 15          | 0         | 0.018 | 0.01   | 0.023  | 0.0057        | 0.9568     |
| ADIM6          | 6           | 0         | 0.032 | -0.032 | 0.041  | 0.0022        | 0.9754     |
| AHB21          | 21          | 0         | 0.174 | -0.163 | 0.257  | 0.0064        | 0.8483     |
| AL2X6          | 6           | 0         | 0.895 | -0.895 | 0.901  | 0.0059        | 1.2407     |
| ALK8           | 8           | 0         | 1.599 | -0.724 | 1.881  | 0.008         | 1.0622     |
| ALKBDE10       | 10          | 0         | 3.186 | -3.115 | 4.195  | 0.0124        | 0.9492     |
| AMINO20X4      | 80          | 0         | 0.098 | -0.039 | 0.129  | 0.1266        | 0.9531     |
| BH76RC         | 30          | 0         | 0.618 | 0.201  | 0.842  | 0.034         | 0.9172     |
| BH76           | 76          | 0         | 0.753 | -0.139 | 1.287  | 0.1205        | 0.7312     |
| BHDIV10        | 10          | 0         | 0.696 | -0.365 | 0.833  | 0.006         | 1.0451     |
| BHPERI         | 26          | 0         | 0.423 | 0.319  | 0.511  | 0.0207        | 1.0347     |
| BHROT27        | 27          | 0         | 0.077 | 0.021  | 0.097  | 0.013         | 0.9956     |
| BSR36          | 36          | 0         | 0.519 | -0.519 | 0.558  | 0.0452        | 1.1634     |
| BUT14DIOL      | 64          | 0         | 0.073 | 0.071  | 0.082  | 0.0656        | 1.1195     |
| CARBHB12       | 12          | 0         | 0.252 | 0.252  | 0.32   | 0.0196        | 0.982      |
| CDIE20         | 20          | 0         | 0.201 | 0.157  | 0.301  | 0.0388        | 0.8328     |
| CHB6           | 6           | 0         | 0.767 | -0.767 | 1.015  | 0.0067        | 0.945      |
| DARC           | 14          | 0         | 0.708 | 0.669  | 0.799  | 0.012         | 1.1079     |
| DC13           | 13          | 0         | 2.371 | 0.328  | 3.155  | 0.022         | 0.9393     |
| DIPCS10        | 10          | 0         | 4.594 | -4.594 | 4.748  | 0.0028        | 1.2096     |
| FH51           | 51          | 0         | 0.69  | 0.178  | 0.892  | 0.0445        | 0.967      |
| G21EA          | 25          | 0         | 2.502 | -2.5   | 2.82   | 0.073         | 1.1091     |
| G21IP          | 36          | 0         | 1.98  | -1.321 | 2.379  | 0.0109        | 1.0405     |
| G2RC           | 25          | 0         | 1.348 | 0.364  | 2.055  | 0.0258        | 0.8197     |
| HAL59          | 59          | 0         | 0.228 | 0.085  | 0.278  | 0.115         | 1.0264     |
| HEAVY28        | 28          | 0         | 0.105 | 0.03   | 0.139  | 0.0927        | 0.9397     |
| HEAVYSB11      | 11          | 0         | 1.706 | -1.706 | 1.814  | 0.0127        | 1.1757     |
| ICONF          | 17          | 0         | 0.101 | -0.007 | 0.134  | 0.0207        | 0.9476     |
| IDISP          | 5           | 1         | 0.419 | 0.41   | 0.538  | 0.0049        | 0.9731     |
| IL16           | 16          | 0         | 0.22  | 0.153  | 0.282  | 0.0013        | 0.9746     |
| INV24          | 21          | 3         | 0.594 | -0.056 | 1.055  | 0.0159        | 0.7043     |
| ISO34          | 34          | 0         | 0.334 | -0.245 | 0.488  | 0.0306        | 0.8551     |
| ISOL24         | 14          | 10        | 0.778 | -0.473 | 1.022  | 0.0221        | 0.9518     |
| MB16-43        | 43          | 0         | 9.938 | -9.55  | 11.348 | 0.0358        | 1.0947     |
| MCONF          | 51          | 0         | 0.088 | 0.062  | 0.108  | 0.0352        | 1.0114     |
| NBPRC          | 6           | 0         | 0.363 | -0.035 | 0.42   | 0.0035        | 1.082      |
| PA26           | 26          | 0         | 1.113 | 1.107  | 1.397  | 0.006         | 0.996      |
| PAREL          | 20          | 0         | 0.308 | 0.003  | 0.531  | 0.0521        | 0.7245     |
| PCONF21        | 18          | 0         | 0.116 | -0.079 | 0.15   | 0.0504        | 0.9634     |
| PNICO23        | 23          | 0         | 0.079 | 0.074  | 0.108  | 0.0167        | 0.9132     |
| PX13           | 13          | 0         | 1.527 | -1.527 | 1.634  | 0.0233        | 1.1682     |
| RC21           | 21          | 0         | 0.682 | -0.372 | 0.943  | 0.0157        | 0.9044     |
| RG18           | 18          | 0         | 0.065 | -0.02  | 0.08   | 0.0797        | 1.019      |
| RSE43          | 43          | 0         | 0.282 | 0.099  | 0.481  | 0.0625        | 0.7324     |
| S22            | 22          | 0         | 0.104 | 0.025  | 0.137  | 0.0123        | 0.9506     |
| S66            | 66          | 0         | 0.118 | 0.061  | 0.159  | 0.0558        | 0.9281     |
| SCONF          | 17          | 0         | 0.123 | 0.008  | 0.192  | 0.0178        | 0.8002     |
| SIE4X4         | 16          | 0         | 5.183 | 5.183  | 5.924  | 0.0965        | 1.0937     |
| TAUT15         | 15          | 0         | 0.385 | -0.145 | 0.462  | 0.0743        | 1.0414     |
| W4-11          | 140         | 0         | 2.225 | -1.786 | 3.066  | 0.0398        | 0.9073     |
| WATER27        | 23          | 4         | 0.638 | 0.612  | 0.712  | 0.0097        | 1.1198     |
| WCPT18         | 18          | 0         | 0.94  | -0.754 | 1.12   | 0.019         | 1.0495     |
| YBDE18         | 18          | 0         | 0.874 | -0.651 | 0.96   | 0.0125        | 1.1386     |
| <b>GMTKN55</b> | <b>1449</b> | <b>50</b> |       |        |        | <b>1.7629</b> |            |

Table S15: MAD, MSD and RMSD as well as breakdown of total WTMAD2 by each subset for DSD3-PBEP86-D3BJ

| subs.name      | Nsys        | Nskip     | MAD   | MSD    | RSMD  | dWTMAD2       | 5MAD/4RMSD |
|----------------|-------------|-----------|-------|--------|-------|---------------|------------|
| ACONF          | 15          | 0         | 0.021 | 0.012  | 0.028 | 0.0068        | 0.9569     |
| ADIM6          | 6           | 0         | 0.031 | -0.031 | 0.039 | 0.0022        | 0.9954     |
| AHB21          | 21          | 0         | 0.202 | -0.101 | 0.286 | 0.0074        | 0.8814     |
| AL2X6          | 6           | 0         | 0.22  | -0.216 | 0.351 | 0.0014        | 0.7834     |
| ALK8           | 8           | 0         | 1.365 | 1.321  | 1.858 | 0.0068        | 0.9182     |
| ALKBDE10       | 10          | 0         | 3.008 | -3.008 | 3.474 | 0.0117        | 1.0824     |
| AMINO20X4      | 80          | 0         | 0.107 | -0.047 | 0.137 | 0.1373        | 0.9746     |
| BH76RC         | 30          | 0         | 0.731 | 0.219  | 0.868 | 0.0402        | 1.0524     |
| BH76           | 76          | 0         | 0.928 | -0.162 | 1.582 | 0.1487        | 0.7334     |
| BHDIV10        | 10          | 0         | 0.938 | -0.702 | 1.089 | 0.0081        | 1.0762     |
| BHPERI         | 26          | 0         | 0.319 | -0.196 | 0.405 | 0.0156        | 0.9852     |
| BHROT27        | 27          | 0         | 0.074 | 0.057  | 0.093 | 0.0124        | 0.9883     |
| BSR36          | 36          | 0         | 1.597 | -1.597 | 1.853 | 0.1393        | 1.0777     |
| BUT14DIOL      | 64          | 0         | 0.06  | -0.021 | 0.074 | 0.0542        | 1.0184     |
| CARBHB12       | 12          | 0         | 0.397 | 0.397  | 0.469 | 0.031         | 1.0582     |
| CDIE20         | 20          | 0         | 0.26  | 0.244  | 0.324 | 0.0503        | 1.0034     |
| CHB6           | 6           | 0         | 1.106 | -1.106 | 1.287 | 0.0097        | 1.0736     |
| DARC           | 14          | 0         | 0.962 | 0.906  | 1.09  | 0.0163        | 1.1029     |
| DC13           | 13          | 0         | 2.783 | -0.405 | 3.724 | 0.0258        | 0.9343     |
| DIPCS10        | 10          | 0         | 4.166 | -4.166 | 4.401 | 0.0025        | 1.1832     |
| FH51           | 51          | 0         | 0.821 | 0.224  | 1.098 | 0.053         | 0.9347     |
| G21EA          | 25          | 0         | 2.297 | -2.001 | 2.624 | 0.067         | 1.0946     |
| G21IP          | 36          | 0         | 2.013 | -0.963 | 2.458 | 0.011         | 1.0238     |
| G2RC           | 25          | 0         | 1.697 | 0.198  | 2.355 | 0.0325        | 0.9006     |
| HAL59          | 59          | 0         | 0.259 | 0.147  | 0.35  | 0.1305        | 0.9261     |
| HEAVY28        | 28          | 0         | 0.143 | 0.139  | 0.182 | 0.1264        | 0.9822     |
| HEAVYSB11      | 11          | 0         | 0.834 | -0.256 | 0.931 | 0.0062        | 1.1203     |
| ICONF          | 17          | 0         | 0.078 | -0.004 | 0.099 | 0.0159        | 0.9812     |
| IDISP          | 5           | 1         | 0.968 | 0.888  | 1.416 | 0.0114        | 0.8544     |
| IL16           | 16          | 0         | 0.45  | 0.45   | 0.533 | 0.0026        | 1.0565     |
| INV24          | 21          | 3         | 0.425 | 0.038  | 0.874 | 0.0114        | 0.607      |
| ISO34          | 34          | 0         | 0.345 | -0.188 | 0.497 | 0.0316        | 0.8689     |
| ISOL24         | 14          | 10        | 1.239 | -0.312 | 1.881 | 0.0352        | 0.8233     |
| MB16-43        | 43          | 0         | 7.676 | -7.136 | 9.679 | 0.0276        | 0.9913     |
| MCONF          | 51          | 0         | 0.092 | 0.051  | 0.117 | 0.0372        | 0.9865     |
| NBPRC          | 6           | 0         | 0.404 | -0.302 | 0.545 | 0.0038        | 0.926      |
| PA26           | 26          | 0         | 1.586 | 1.586  | 1.881 | 0.0086        | 1.0542     |
| PAREL          | 20          | 0         | 0.376 | -0.004 | 0.638 | 0.0636        | 0.7356     |
| PCONF21        | 18          | 0         | 0.176 | -0.061 | 0.216 | 0.0766        | 1.0178     |
| PNICO23        | 23          | 0         | 0.25  | 0.242  | 0.333 | 0.0527        | 0.9366     |
| PX13           | 13          | 0         | 1.428 | -1.428 | 1.491 | 0.0218        | 1.1976     |
| RC21           | 21          | 0         | 0.849 | -0.503 | 1.008 | 0.0196        | 1.0521     |
| RG18           | 18          | 0         | 0.068 | -0.017 | 0.085 | 0.0826        | 1.0008     |
| RSE43          | 43          | 0         | 0.543 | 0.468  | 1.081 | 0.1205        | 0.6283     |
| S22            | 22          | 0         | 0.164 | -0.015 | 0.209 | 0.0194        | 0.9801     |
| S66            | 66          | 0         | 0.116 | 0.054  | 0.153 | 0.0551        | 0.9518     |
| SCONF          | 17          | 0         | 0.102 | -0.084 | 0.133 | 0.0148        | 0.9628     |
| SIE4X4         | 16          | 0         | 5.329 | 5.329  | 6.12  | 0.0992        | 1.0883     |
| TAUT15         | 15          | 0         | 0.42  | -0.22  | 0.514 | 0.081         | 1.0208     |
| W4-11          | 140         | 0         | 2.406 | -1.831 | 3.427 | 0.043         | 0.8774     |
| WATER27        | 23          | 4         | 0.57  | 0.458  | 0.697 | 0.0087        | 1.0233     |
| WCPT18         | 18          | 0         | 0.878 | -0.812 | 1.15  | 0.0177        | 0.955      |
| YBDE18         | 18          | 0         | 0.584 | -0.1   | 0.732 | 0.0084        | 0.9977     |
| <b>GMTKN55</b> | <b>1449</b> | <b>50</b> |       |        |       | <b>2.1247</b> |            |



Table S16: MAD, MSD and RMSD as well as breakdown of total WTMAD2 by each subset for DSD3-PBEP86-D4

| subs.name      | Nsys        | Nskip     | MAD    | MSD     | RSMD   | dWTMAD2       | 5MAD/4RMSD |
|----------------|-------------|-----------|--------|---------|--------|---------------|------------|
| ACONF          | 15          | 0         | 0.022  | 0.013   | 0.03   | 0.0071        | 0.9202     |
| ADIM6          | 6           | 0         | 0.029  | -0.013  | 0.039  | 0.002         | 0.9269     |
| AHB21          | 21          | 0         | 0.177  | -0.097  | 0.265  | 0.0065        | 0.836      |
| AL2X6          | 6           | 0         | 1.546  | -1.546  | 1.567  | 0.0101        | 1.2332     |
| ALK8           | 8           | 0         | 1.465  | -0.999  | 1.75   | 0.0073        | 1.0462     |
| ALKBDE10       | 10          | 0         | 3.179  | -3.179  | 3.723  | 0.0124        | 1.0675     |
| AMINO20X4      | 80          | 0         | 0.114  | -0.051  | 0.145  | 0.1463        | 0.9803     |
| BH76RC         | 30          | 0         | 0.734  | 0.203   | 0.879  | 0.0404        | 1.044      |
| BH76           | 76          | 0         | 0.899  | -0.102  | 1.587  | 0.144         | 0.7083     |
| BHDIV10        | 10          | 0         | 0.778  | -0.522  | 0.993  | 0.0067        | 0.9801     |
| BHPERI         | 26          | 0         | 0.23   | -0.018  | 0.274  | 0.0113        | 1.0515     |
| BHROT27        | 27          | 0         | 0.065  | 0.038   | 0.081  | 0.0109        | 1.0014     |
| BSR36          | 36          | 0         | 1.532  | -1.532  | 1.761  | 0.1336        | 1.0875     |
| BUT14DIOL      | 64          | 0         | 0.049  | 0.039   | 0.066  | 0.0441        | 0.9279     |
| CARBHB12       | 12          | 0         | 0.336  | 0.336   | 0.407  | 0.0262        | 1.0322     |
| CDIE20         | 20          | 0         | 0.294  | 0.28    | 0.358  | 0.0568        | 1.025      |
| CHB6           | 6           | 0         | 0.654  | -0.523  | 0.794  | 0.0057        | 1.0287     |
| DARC           | 14          | 0         | 1.173  | 1.165   | 1.303  | 0.0198        | 1.1254     |
| DC13           | 13          | 0         | 2.709  | 0.186   | 3.299  | 0.0251        | 1.0264     |
| DIPCS10        | 10          | 0         | 3.924  | -3.924  | 4.135  | 0.0024        | 1.1863     |
| FH51           | 51          | 0         | 0.852  | 0.278   | 1.131  | 0.055         | 0.942      |
| G21EA          | 25          | 0         | 2.168  | -1.828  | 2.515  | 0.0632        | 1.0779     |
| G21IP          | 36          | 0         | 1.968  | -0.887  | 2.427  | 0.0108        | 1.0137     |
| G2RC           | 25          | 0         | 1.524  | 0.239   | 2.149  | 0.0291        | 0.8862     |
| HAL59          | 59          | 0         | 0.192  | 0.064   | 0.245  | 0.0968        | 0.9821     |
| HEAVY28        | 28          | 0         | 0.102  | 0.037   | 0.139  | 0.09          | 0.9153     |
| HEAVYSB11      | 11          | 0         | 1.445  | -1.445  | 1.605  | 0.0107        | 1.125      |
| ICONF          | 17          | 0         | 0.113  | -0.031  | 0.159  | 0.0231        | 0.8874     |
| IDISP          | 5           | 1         | 1.047  | 0.917   | 1.409  | 0.0123        | 0.9289     |
| IL16           | 16          | 0         | 0.315  | 0.309   | 0.373  | 0.0018        | 1.0553     |
| INV24          | 21          | 3         | 0.576  | -0.139  | 0.943  | 0.0154        | 0.7629     |
| ISO34          | 34          | 0         | 0.378  | -0.243  | 0.556  | 0.0346        | 0.8505     |
| ISOL24         | 14          | 10        | 1.307  | -0.497  | 1.871  | 0.0372        | 0.8733     |
| MB16-43        | 43          | 0         | 14.657 | -14.657 | 16.319 | 0.0528        | 1.1227     |
| MCONF          | 51          | 0         | 0.074  | -0.001  | 0.089  | 0.0299        | 1.0379     |
| NBPRC          | 6           | 0         | 0.531  | -0.04   | 0.67   | 0.0051        | 0.99       |
| PA26           | 26          | 0         | 1.264  | 1.259   | 1.574  | 0.0068        | 1.0036     |
| PAREL          | 20          | 0         | 0.37   | 0.004   | 0.654  | 0.0627        | 0.7067     |
| PCONF21        | 18          | 0         | 0.108  | -0.055  | 0.139  | 0.0472        | 0.9748     |
| PNICO23        | 23          | 0         | 0.111  | 0.106   | 0.132  | 0.0233        | 1.0492     |
| PX13           | 13          | 0         | 1.374  | -1.374  | 1.442  | 0.021         | 1.1906     |
| RC21           | 21          | 0         | 0.93   | -0.744  | 1.164  | 0.0215        | 0.9984     |
| RG18           | 18          | 0         | 0.068  | -0.013  | 0.081  | 0.0824        | 1.0446     |
| RSE43          | 43          | 0         | 0.559  | 0.478   | 1.105  | 0.124         | 0.6321     |
| S22            | 22          | 0         | 0.122  | 0.074   | 0.142  | 0.0145        | 1.0787     |
| S66            | 66          | 0         | 0.136  | 0.1     | 0.165  | 0.0643        | 1.0315     |
| SCONF          | 17          | 0         | 0.096  | -0.091  | 0.137  | 0.0139        | 0.8745     |
| SIE4X4         | 16          | 0         | 5.295  | 5.295   | 6.114  | 0.0985        | 1.0827     |
| TAUT15         | 15          | 0         | 0.407  | -0.224  | 0.509  | 0.0786        | 1          |
| W4-11          | 140         | 0         | 2.49   | -1.895  | 3.493  | 0.0446        | 0.8912     |
| WATER27        | 23          | 4         | 0.49   | 0.349   | 0.584  | 0.0074        | 1.0483     |
| WCPT18         | 18          | 0         | 0.809  | -0.74   | 1.054  | 0.0163        | 0.9591     |
| YBDE18         | 18          | 0         | 0.9    | -0.502  | 1.038  | 0.0129        | 1.0838     |
| <b>GMTKN55</b> | <b>1449</b> | <b>50</b> |        |         |        | <b>2.0266</b> |            |

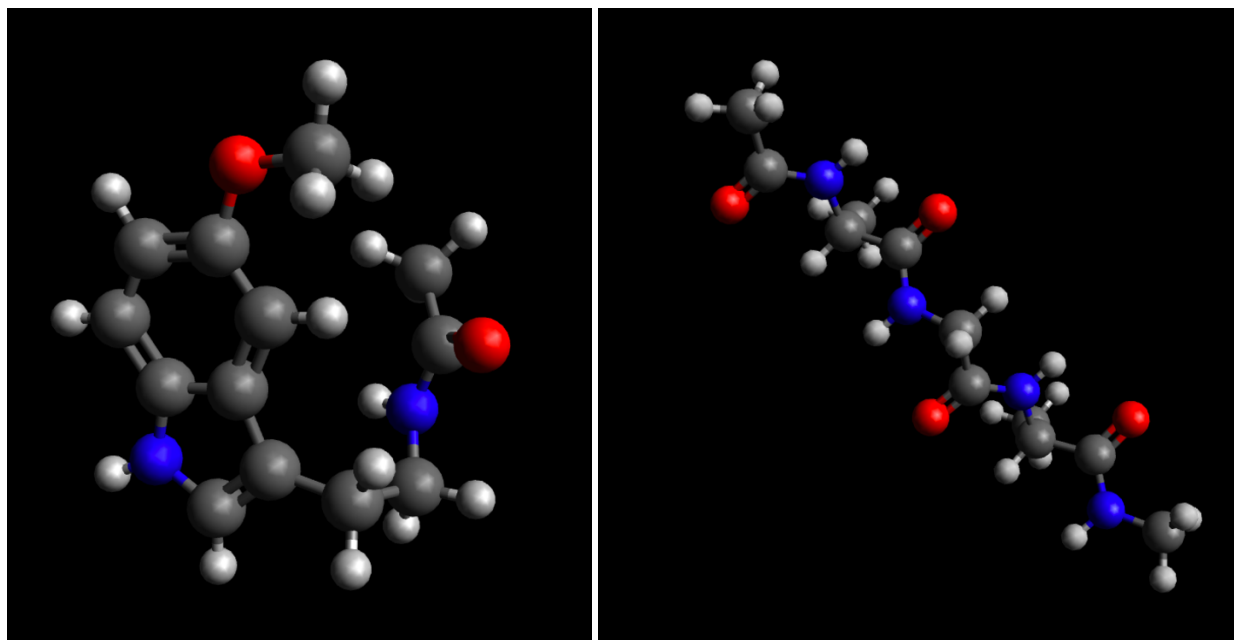

Figure S1. Structures of two systems upon which we experimented the computational time requirements for different functionals. MCONF<sub>1</sub> (left), PCONF21<sub>GLY(ab)</sub> (right).

## ORCA sample input files for CO:

### 1. revDSD-PBEP86-D3(BJ)

```
!PAL8

%MaxCore 2500

! RKS def2-QZVPP def2-qzvpp/c def2/j tightscf rijcosx GRID6 NoPOP d3bj

%method
  Exchange X_PBE
  Correlation C_P86
ScalHFX 0.69
ScalDFX 0.31
ScalGGAC 0.4296
ScalLDAC 0.4296
  ScalMP2C 1.0
  D3S6 0.4377
  D3A2 5.5
  D3S8 0.0
  D3A1 0.0
end

%mp2
DoSCS true
  PS 0.5785
  PT 0.0799
end

*xyz 0 1
  C    0.000000    0.000000    0.000000
  O    0.000000    0.000000    1.131400
*
```

### 2. revDSD-PBEPBE-D3(BJ)

```
!PAL8

%MaxCore 2500

! RKS def2-QZVPP def2-qzvpp/c def2/j tightscf rijcosx GRID6 NoPOP d3bj
%method
  Exchange X_PBE
  Correlation C_PBE
ScalHFX 0.68
ScalDFX 0.32
ScalGGAC 0.4528
ScalLDAC 0.4528
  ScalMP2C 1.0
  D3S6 0.5746
  D3A2 5.50
  D3S8 0.0
  D3A1 0.0
end
```

```

%mp2
DoSCS true
  PS 0.5845
  PT 0.0711
end

*xyz 0 1
  C    0.000000    0.000000    0.000000
  O    0.000000    0.000000    1.131400
*
```

## References

- (1) Goerigk, L.; Hansen, A.; Bauer, C.; Ehrlich, S.; Najibi, A.; Grimme, S. A Look at the Density Functional Theory Zoo with the Advanced GMTKN55 Database for General Main Group Thermochemistry, Kinetics and Noncovalent Interactions. *Phys. Chem. Chem. Phys.* **2017**, *19*, 32184–32215.
- (2) Goerigk, L.; Grimme, S. A Thorough Benchmark of Density Functional Methods for General Main Group Thermochemistry, Kinetics, and Noncovalent Interactions. *Phys. Chem. Chem. Phys.* **2011**, *13*, 6670–6688.
- (3) Goerigk, L.; Mehta, N. A Trip to the Density Functional Theory Zoo: Warnings and Recommendations for the User\*. *Aust. J. Chem.* **2019**.
- (4) Gruzman, D.; Karton, A.; Martin, J. M. L. Performance of Ab Initio and Density Functional Methods for Conformational Equilibria of C<sub>n</sub>H<sub>2n+2</sub> Alkane Isomers (n = 4–8) †. *J. Phys. Chem. A* **2009**, *113*, 11974–11983.
- (5) Grimme, S.; Antony, J.; Ehrlich, S.; Krieg, H. A Consistent and Accurate Ab Initio Parametrization of Density Functional Dispersion Correction (DFT-D) for the 94 Elements H–Pu. *J. Chem. Phys.* **2010**, *132*, 154104.
- (6) Lao, K. U.; Schäffer, R.; Jansen, G.; Herbert, J. M. Accurate Description of Intermolecular Interactions Involving Ions Using Symmetry-Adapted Perturbation Theory. *J. Chem. Theory Comput.* **2015**, *11*, 2473–2486.
- (7) Yu, H.; Truhlar, D. G. Components of the Bond Energy in Polar Diatomic Molecules, Radicals, and Ions Formed by Group-1 and Group-2 Metal Atoms. *J. Chem. Theory Comput.* **2015**, *11*, 2968–2983.
- (8) Kesharwani, M. K.; Karton, A.; Martin, J. M. L. Benchmark Ab Initio Conformational Energies for the Proteinogenic Amino Acids through Explicitly Correlated Methods. Assessment of Density Functional Methods. *J. Chem. Theory Comput.* **2016**, *12*, 444–454.
- (9) Goerigk, L.; Grimme, S. A General Database for Main Group Thermochemistry, Kinetics, and Noncovalent Interactions – Assessment of Common and Re-parameterized (Meta -)GGA Density Functionals. *J. Chem. Theory Comput.* **2010**, *6*, 107–126.
- (10) Zhao, Y.; Lynch, B. J.; Truhlar, D. G. Multi-Coefficient Extrapolated Density Functional Theory for Thermochemistry and Thermochemical Kinetics. *Phys. Chem. Chem. Phys.* **2005**, *7*, 43.
- (11) Zhao, Y.; González-Garda, N.; Truhlar, D. G. Benchmark Database of Barrier Heights for

- Heavy Atom Transfer, Nucleophilic Substitution, Association, and Unimolecular Reactions and Its Use to Test Theoretical Methods. *J. Phys. Chem. A* **2005**, *109*, 2012–2018.
- (12) Goerigk, L.; Grimme, S.; Chemie, T. O. A General Database for Main Group Thermochemistry, Kinetics, and Non-Covalent Interactions – Assessment of Common and Re-parameterized (Meta-) GGA Density Functionals Supporting Information. **2009**, 1–32.
- (13) Guner, V.; Khuong, K. S.; Leach, A. G.; Lee, P. S.; Bartberger, M. D.; Houk, K. N. A Standard Set of Pericyclic Reactions of Hydrocarbons for the Benchmarking of Computational Methods: The Performance of Ab Initio, Density Functional, CASSCF, CASPT2, and CBS-QB3 Methods for the Prediction of Activation Barriers, Reaction Energetics. **2003**, 11445–11459.
- (14) Ess, D. H.; Houk, K. N. Activation Energies of Pericyclic Reactions: Performance of DFT, MP2, and CBS-QB3 Methods for the Prediction of Activation Barriers and Reaction Energetics of 1,3-Dipolar Cycloadditions, and Revised Activation Enthalpies for a Standard Set of Hydroc. **2005**, 9542–9553.
- (15) Dinadayalane, T. C.; Vijaya, R.; Smitha, A.; Sastry, G. N. Diels–Alder Reactivity of Butadiene and Cyclic Five-Membered Dienes ((CH)<sub>4</sub>X, X = CH<sub>2</sub>, SiH<sub>2</sub>, O, NH, PH, and S) with Ethylene: A Benchmark Study. *J. Phys. Chem. A* **2002**, *106*, 1627–1633.
- (16) Steinmann, S. N.; Csonka, G.; Corminboeuf, C. Unified Inter- and Intramolecular Dispersion Correction Functional Theory. *J. Chem. Theory Comput.* **2009**, *5*, 2950–2958.
- (17) Krieg, H.; Grimme, S. Thermochemical Benchmarking of Hydrocarbon Bond Separation Reaction Energies: Jacob's Ladder Is Not Reversed! *Mol. Phys.* **2010**, *108*, 2655–2666.
- (18) Kozuch, S.; Bachrach, S. M.; Martin, J. M. L. Conformational Equilibria in Butane-1,4-Diol: A Benchmark of a Prototypical System with Strong Intramolecular H - Bonds. **2014**.
- (19) Sure, R.; Hansen, A.; Schwerdtfeger, P.; Grimme, S. Comprehensive Theoretical Study of All 1812 C<sub>60</sub>isomers. *Phys. Chem. Chem. Phys.* **2017**, *19*, 14296–14305.
- (20) Yu, L.; Karton, A. Assessment of Theoretical Procedures for a Diverse Set of Isomerization Reactions Involving Double-Bond Migration in Conjugated Dienes. *Chem. Phys.* **2014**, *441*, 166–177.
- (21) Johnson, E. R.; Mori-Sánchez, P.; Cohen, A. J.; Yang, W. Delocalization Errors in Density Functionals and Implications for Main-Group Thermochemistry. *J. Chem. Phys.* **2008**, *129*, 204112.
- (22) Zhao, Y.; Truhlar, D. G. The M06 Suite of Density Functionals for Main Group Thermochemistry, Thermochemical Kinetics, Noncovalent Interactions, Excited States, and Transition Elements: Two New Functionals and Systematic Testing of Four M06-Class Functionals and 12 Other Function. *Theor. Chem. Acc.* **2008**, *120*, 215–241.
- (23) Grimme, S. Semiempirical Hybrid Density Functional with Perturbative Second-Order Correlation. *J. Chem. Phys.* **2006**, *124*, 0–16.
- (24) Grimme, S.; Mück-Lichtenfeld, C.; Würthwein, E. U.; Ehlers, A. W.; Goumans, T. P. M.; Lammertsma, K. Consistent Theoretical Description of 1,3-Dipolar Cycloaddition Reactions. *J. Phys. Chem. A* **2006**, *110*, 2583–2586.
- (25) Piacenza, M.; Grimme, S. Systematic Quantum Chemical Study of DNA-Base Tautomers. *J. Comput. Chem.* **2004**, *25*, 83–98.
- (26) Woodcock, H. L.; Schaefer, H. F.; Schreiner, P. R. Problematic Energy Differences between

- Cumulenes and Poly-Ynes: Does This Point to a Systematic Improvement of Density Functional Theory? *J. Phys. Chem. A* **2002**, *106*, 11923–11931.
- (27) Schreiner, P. R.; Fokin, A. A.; Pascal, R. A.; Meijere, A. De. Many Density Functional Theory Approaches Fail To Give Reliable Large Hydrocarbon Isomer Energy Differences. **2006**, 10–13.
- (28) Lepetit, C.; Chermette, H.; Heully, J.; Lyon, D.; Uni, V.; Umr, C. Description of Carbo - Oxocarbons and Assessment of Exchange-Correlation Functionals for the DFT Description of Carbo -Mers. **2007**, 136–149.
- (29) Lee, J. S. Accurate Ab Initio Binding Energies of Alkaline Earth Metal Clusters. *J. Phys. Chem. A* **2005**, *109*, 11927–11932.
- (30) Karton, A.; Martin, J. M. L. Explicitly Correlated Benchmark Calculations on C<sub>8</sub>H<sub>8</sub> Isomer Energy Separations : How Accurate Are DFT , Double-Hybrid , and Composite Ab Initio Procedures ? **2012**, 8976.
- (31) Zhao, Y.; Tishchenko, O.; Gour, J. R.; Li, W.; Lutz, J. J.; Piecuch, P.; Truhlar, D. G. Thermochemical Kinetics for Multireference Systems: Addition Reactions of Ozone. *J. Phys. Chem. A* **2009**, *113*, 5786–5799.
- (32) Manna, D.; Martin, J. M. L. What Are the Ground State Structures of C<sub>20</sub> and C<sub>24</sub> ? An Explicitly Correlated Ab Initio Approach. **2016**.
- (33) Friedrich, J.; Hänchen, J. Incremental CCSD(T)(F12\*)|MP2: A Black Box Method to Obtain Highly Accurate Reaction Energies. *J. Chem. Theory Comput.* **2013**, *9*, 5381–5394.
- (34) Friedrich, J. Efficient Calculation of Accurate Reaction Energies—Assessment of Different Models in Electronic Structure Theory. *J. Chem. Theory Comput.* **2015**, *11*, 3596–3609.
- (35) You, A.; Be, M. A. Y.; In, I. Gaussian-2 Theory for Molecular Energies of First- and Second-Row Compounds. **1998**, 7221.
- (36) Curtiss, L. A.; Redfern, P. C. Assessment of Gaussian-2 and Density Functional Theories for the Computation of Enthalpies of Formation for the Computation of Enthalpies of Formation. **2000**, 1063.
- (37) Kozuch, S.; Martin, J. M. L. Halogen Bonds: Benchmarks and Theoretical Analysis. *J. Chem. Theory Comput.* **2013**, *9*, 1918–1931.
- (38) Řezáč, J.; Riley, K. E.; Hobza, P. Benchmark Calculations of Noncovalent Interactions of Halogenated Molecules. *J. Chem. Theory Comput.* **2012**, *8*, 4285–4292.
- (39) Schwabe, T.; Grimme, S. Double-Hybrid Density Functionals with Long-Range Dispersion Corrections: Higher Accuracy and Extended Applicability. *Phys. Chem. Chem. Phys.* **2007**, *9*, 3397–3406.
- (40) Grimme, S. Seemingly Simple Stereoelectronic Effects in Alkane Isomers and the Implications for Kohn–Sham Density Functional Theory. *Angew. Chemie Int. Ed.* **2006**, *45*, 4460–4464.
- (41) Goerigk, L.; Grimme, S. Efficient and Accurate Double-Hybrid-Meta-GGA Density Functionals—Evaluation with the Extended GMTKN30 Database for General Main Group Thermochemistry, Kinetics, and Noncovalent Interactions. *J. Chem. Theory Comput.* **2011**, *7*, 291–309.
- (42) Grimme, S.; Steinmetz, M.; Korth, M. How to Compute Isomerization Energies of Organic Molecules with Quantum Chemical Methods. *J. Org. Chem.* **2007**, *72*, 2118–2126.
- (43) Goerigk, L.; Sharma, R. The INV24 Test Set: How Well Do Quantum-Chemical Methods

- Describe Inversion and Racemization Barriers? *Can. J. Chem.* **2016**, *94*, 1133–1143.
- (44) Huenerbein, R.; Schirmer, B.; Moellmann, J.; Grimme, S. Effects of London Dispersion on the Isomerization Reactions of Large Organic Molecules: A Density Functional Benchmark Study. *Phys. Chem. Chem. Phys.* **2010**, *12*, 6940–6948.
- (45) Fogueri, U. R.; Kozuch, S.; Karton, A.; Martin, J. M. L. The Melatonin Conformer Space: Benchmark and Assessment of Wave Function and DFT Methods for a Paradigmatic Biological and Pharmacological Molecule. *J. Phys. Chem. A* **2013**, *117*, 2269–2277.
- (46) Grimme, S.; Kruse, H.; Goerigk, L.; Erker, G. The Mechanism of Dihydrogen Activation by Frustrated Lewis Pairs Revisited. *Angew. Chemie Int. Ed.* **2010**, *49*, 1402–1405.
- (47) Setiawan, D.; Kraka, E.; Cremer, D. Strength of the Pnictogen Bond in Complexes Involving Group Va Elements N, P, and As. **2015**.
- (48) Karton, A.; O'Reilly, R. J.; Chan, B.; Radom, L. Determination of Barrier Heights for Proton Exchange in Small Water, Ammonia, and Hydrogen Fluoride Clusters with G4(MP2)-Type, MPn, and SCS-MPn Procedures—a Caveat. *J. Chem. Theory Comput.* **2012**, *8*, 3128–3136.
- (49) Neese, F.; Schwabe, T.; Kossmann, S.; Schirmer, B.; Grimme, S. Assessment of Orbital-Optimized, Spin-Component Scaled Second-Order Many-Body Perturbation Theory for Thermochemistry and Kinetics. **2009**, 3060–3073.
- (50) Jurečka, P.; Šponer, J.; Černý, J.; Hobza, P. Benchmark Database of Accurate (MP2 and CCSD(T) Complete Basis Set Limit) Interaction Energies of Small Model Complexes, DNA Base Pairs, and Amino Acid Pairs. *Phys. Chem. Chem. Phys.* **2006**, *8*, 1985–1993.
- (51) Řezáč, J.; Riley, K. E.; Hobza, P. S66: A Well-Balanced Database of Benchmark Interaction Energies Relevant to Biomolecular Structures. *J. Chem. Theory Comput.* **2011**, *7*, 2427–2438.
- (52) French, A. D.; Johnson, G. P.; Stortz, C. A. Evaluation of Density Functionals and Basis Sets for Ga. **2009**, 679–692.
- (53) Karton, A.; Rabinovich, E.; Martin, J. M. L.; Ruscic, B. W4 Theory for Computational Thermochemistry: In Pursuit of Confident Sub-KJ/Mol Predictions. *J. Chem. Phys.* **2006**, *125*, 144108.
- (54) Kruse, H.; Mladek, A.; Gkionis, K.; Hansen, A.; Grimme, S.; Sponer, J. Quantum Chemical Benchmark Study on 46 RNA Backbone Families Using a Dinucleotide Unit. *J. Chem. Theory Comput.* **2015**, *11*, 4972–4991.
- (55) Karton, A.; Daon, S.; Martin, J. M. L. W4-11: A High-Confidence Benchmark Dataset for Computational Thermochemistry Derived from First-Principles W4 Data. *Chem. Phys. Lett.* **2011**, *510*, 165–178.
- (56) Iii, W. A. G.; Park, U. V.; Pennsylv, V. Evaluation of B3LYP, X3LYP, and M06-Class Density Functionals for Predicting the Binding Energies of Neutral, Protonated, and Deprotonated Water Clusters. **2009**, 1016–1026.
- (57) Karton, A.; O'Reilly, R. J.; Radom, L. Assessment of Theoretical Procedures for Calculating Barrier Heights for a Diverse Set of Water-Catalyzed Proton-Transfer Reactions. *J. Phys. Chem. A* **2012**, *116*, 4211–4221.
- (58) Zhao, Y.; Ng, H. T.; Peverati, R.; Truhlar, D. G. Benchmark Database for Ylidic Bond Dissociation Energies and Its Use for Assessments of Electronic Structure Methods. *J. Chem. Theory Comput.* **2012**, *8*, 2824–2834.
- (59) Cao, J.; Berne, B. J. Many-body Dispersion Forces of Polarizable Clusters and Liquids. *J.*

- Chem. Phys.* **1992**, *97*, 8628–8636.
- (60) Hermann, J.; DiStasio, R. A.; Tkatchenko, A. First-Principles Models for van Der Waals Interactions in Molecules and Materials: Concepts, Theory, and Applications. *Chem. Rev.* **2017**, *117*, 4714–4758.
- (61) Santra, G.; Sylvetsky, N.; Martin, J. M. L. Minimally Empirical Double-Hybrid Functionals Trained against the GMTKN55 Database: RevDSD-PBEP86-D4, RevDOD-PBE-D4, and DOD-SCAN-D4. *J. Phys. Chem. A* **2019**, *123*, 5129–5143.
- (62) Karton, A.; Martin, J. M. L. Explicitly Correlated Wn Theory: W1-F12 and W2-F12. *J. Chem. Phys.* **2012**, *136*, 124114.
- (63) Weigend, F.; Ahlrichs, R. Balanced Basis Sets of Split Valence, Triple Zeta Valence and Quadruple Zeta Valence Quality for H to Rn: Design and Assessment of Accuracy. *Phys. Chem. Chem. Phys.* **2005**, *7*, 3297–3305.
- (64) Sancho-García, J. C.; Brémond; Savarese, M.; Pérez-Jiménez, A. J.; Adamo, C. Partnering Dispersion Corrections with Modern Parameter-Free Double-Hybrid Density Functionals. *Phys. Chem. Chem. Phys.* **2017**, *19*, 13481–13487.
- (65) Hui, K.; Chai, J. Da. SCAN-Based Hybrid and Double-Hybrid Density Functionals from Models without Fitted Parameters. *J. Chem. Phys.* **2016**, *144*, 044114.
- (66) Yanai, T.; Tew, D. P.; Handy, N. C. A New Hybrid Exchange–Correlation Functional Using the Coulomb-Attenuating Method (CAM-B3LYP). *Chem. Phys. Lett.* **2004**, *393*, 51–57.
- (67) Verma, P.; Wang, Y.; Ghosh, S.; He, X.; Truhlar, D. G. Revised M11 Exchange-Correlation Functional for Electronic Excitation Energies and Ground-State Properties. *J. Phys. Chem. A* **2019**, *123*, 2966–2990.
- (68) Santra, G.; Martin, J. M. L. Some Observations on the Performance of the Most Recent Exchange-Correlation Functionals for the Large and Chemically Diverse GMTKN55 Benchmark. In *AIP Conference Proceedings*; 2019; p 030004.
- (69) Adamo, C.; Barone, V. Toward Reliable Density Functional Methods without Adjustable Parameters: The PBE0 Model. *J. Chem. Phys.* **1999**, *110*, 6158–6170.
- (70) Zhao, Y.; Truhlar, D. G. Design of Density Functionals That Are Broadly Accurate for Thermochemistry, Thermochemical Kinetics, and Nonbonded Interactions. *J. Phys. Chem. A* **2005**, *109*, 5656–5667.
- (71) Becke, A. D. A New Mixing of Hartree-Fock and Local Density-Functional Theories. *J. Chem. Phys.* **1993**, *98*, 1372–1377.
- (72) Mardirossian, N.; Head-Gordon, M. Mapping the Genome of Meta-Generalized Gradient Approximation Density Functionals: The Search for B97M-V. *J. Chem. Phys.* **2015**, *142*, 074111.
- (73) Sun, J.; Ruzsinszky, A.; Perdew, J. Strongly Constrained and Appropriately Normed Semilocal Density Functional. *Phys. Rev. Lett.* **2015**, *115*, 036402.
- (74) Perdew, J. P.; Ruzsinszky, A.; Csonka, G. I.; Constantin, L. A.; Sun, J. Workhorse Semilocal Density Functional for Condensed Matter Physics and Quantum Chemistry. *Phys. Rev. Lett.* **2009**, *103*, 026403.
- (75) Perdew, J. P.; Burke, K.; Ernzerhof, M. Generalized Gradient Approximation Made Simple. *Phys. Rev. Lett.* **1996**, *77*, 3865–3868.
- (76) Perdew, J. P.; Ernzerhof, M.; Burke, K. [ERRATA] Generalized Gradient Approximation Made Simple. *Phys. Rev. Lett.* **1996**, *77*, 3865–3868.



- (77) Slater, J. C. A Simplification of the Hartree-Fock Method. *Phys. Rev.* **1951**, *81*, 385–390.
- (78) Perdew, J. P.; Wang, Y. Accurate and Simple Analytic Representation of the Electron-Gas Correlation Energy. *Phys. Rev. B* **1992**, *45*, 13244–13249.
- (79) Martin, J. M. L.; Santra, G. Empirical Double-Hybrid Density Functional Theory: A ‘Third Way’ in Between WFT and DFT. *Isr. J. Chem.* **2020**, *60*, 787–804.
